1  
2  
3  
4  
5  
6  
7  
8  
9  
10  
11  
12  
13  
14  
15  
16  
17  
18  
19  
20  
21  
22  
23  
24  
25  
26  
27  
28

# **EBV LMP1-activated mTORC1 and mTORC2 Coordinately Promote Nasopharyngeal Cancer Stem Cell Formation**

**(Running title: mTORC1/2 and Nasopharyngeal Cancer Stem Cells)**

Nannan Zhu<sup>a,b</sup>, Qian Wang<sup>b</sup>, Zhidong Wu<sup>b</sup>, Yan Wang<sup>b,c</sup>,  
Mu-Sheng Zeng<sup>a\*</sup>, Yan Yuan<sup>d,\*</sup>

<sup>a</sup> State Key Laboratory of Oncology in South China, Sun Yat-sen University Cancer Center, Guangzhou 510060, China;

<sup>b</sup> Institute of Human Virology, Zhongshan School of Medicine, Sun Yat-sen University, Guangzhou, Guangdong 510080, China;

<sup>c</sup>Guanghua School of Stomatology, Sun Yat-Sen University, Guangzhou, Guangdong 510080, China;

<sup>d</sup>Department of Basic and Translational Sciences, University of Pennsylvania School of Dental Medicine, Philadelphia, PA 19104, USA

\*Corresponding authors. Yan Yuan, Department of Basic and Translational Sciences, University of Pennsylvania School of Dental Medicine, Philadelphia, PA 19104. Email: [yuan2@upenn.edu](mailto:yuan2@upenn.edu); Mu-Sheng Zeng, State Key Laboratory of Oncology in South China, Sun Yat-sen University Cancer Center, Guangzhou 510060, China. Email: [zengmsh@sysucc.org.cn](mailto:zengmsh@sysucc.org.cn)

**Key words:** Nasopharyngeal carcinoma (NPC), Epstein-Barr Virus (EBV), LMP1, mTORC1, mTORC2, Cancer Stem Cell,

## 29 **Abstract**

30 Epstein-Barr Virus (EBV) is associated with several malignant diseases, including Burkitt's  
31 lymphoma, nasopharyngeal carcinoma (NPC), certain types of lymphomas, and a portion of  
32 gastric cancers. Virus-encoded oncoprotein LMP1 induces the epithelial-to-mesenchymal  
33 transition (EMT), leading to cancer stem cell formation. In the current study, we investigated  
34 how LMP1 contributes to cancer stem cell development in NPC. We found that LMP1 plays an  
35 essential role in acquiring CSC characteristics, including tumor initiation, metastasis, and  
36 therapeutic resistance by activating the PI3K/mTOR/Akt signaling pathway. We dissected the  
37 functions of distinct signaling (mTORC1 and mTORC2) in the acquisition of different CSC  
38 characteristics. Side population (SP) formation, which represents the chemotherapy resistance  
39 feature of CSC, requires mTORC1 signaling. Tumor initiation capability is mainly attributed to  
40 mTORC2, which confers on NPC the capabilities of proliferation and survival by activating  
41 mTORC2 downstream genes c-Myc. Both mTORC1 and mTORC2 enhance cell migration and  
42 invasion of NPC cells, suggesting that mTORC1/2 co-regulate metastasis of NPC. The revelation  
43 of the roles of the mTOR signaling pathways in distinct tumorigenic features provides a  
44 guideline for designing efficient therapies by choosing specific mTOR inhibitors targeting  
45 mTORC1, mTORC2, or both to achieve durable remission of NPC in patients.

## 46 **Significance**

47 LMP1 endows NPC to gain cancer stem cell characteristics through activating mTORC1 and  
48 mTORC2 pathways. The different mTOR pathways are responsible for distinct tumorigenic  
49 features. Rapamycin-insensitive mTORC1 is essential for CSC drug resistance. NPC tumor  
50 initiation capacity is mainly attributed to mTORC2 signaling. mTORC1 and mTORC2 co-

- 51 regulate NPC cell migration and invasion. The revelation of the roles of mTOR signaling in NPC
- 52 CSC establishment has implications for novel therapeutic strategies to treat relapsed and
- 53 metastatic NPC and achieve durable remission.

## 54 **Introduction**

55 Nasopharyngeal carcinoma (NPC) is one of the most aggressive head and neck malignancy  
56 arising from the nasopharynx epithelium. NPC has unique geographic distribution and affects  
57 defined populations, mainly in Southern China, Southeast Asia, the Arctic, and Northern Africa  
58 (1). In these endemic regions, most NPC cases (>95%) are non-keratinizing carcinoma and  
59 invariably associated with Epstein-Barr virus (EBV) infection (2). Although NPC patients'  
60 overall survival has improved in recent years, 21.3% of patients in a study suffered from  
61 recurrence, distant metastases and radiotherapy failure (3). Cancer stem cells (CSCs) have been  
62 implicated to be involved in cancer relapse and metastasis. Understanding how CSCs are  
63 generated and maintained in NPC will lead to novel strategies for NPC treatment.

64 EBV latent membrane protein1 (LMP1) is an oncoprotein and detected in most of invasive and  
65 malignant NPC lesions (4). It has been shown that LMP1 induces the epithelial-to-mesenchymal  
66 transition (EMT) and increase metastasis of NPC (5). We reported that LMP1 plays a crucial role  
67 in promoting EMT in NPC to generate various subpopulations of CSCs arrayed along the  
68 epithelial (E) to mesenchymal (M) spectrum. Furthermore, we demonstrated that the hybrid E/M  
69 state exhibits the highest tumor initiating capacity, while the xM state contributes to  
70 vasculogenic mimicry, a hallmark of metastatic cancers (6). However, the mechanism underlying  
71 LMP1 regulating CSC development and maintenance remains unknown. Transcriptomic analysis  
72 revealed that the PI3K/mTOR/Akt signaling is the most significantly affected pathway in EBV-  
73 infected NPC cells compared to EBV negative NPC cells (7). This finding, together with the  
74 previous report that LMP1 activates the mTOR/AKT signaling pathway (8, 9), prompted us to  
75 investigate if the mTOR signaling pathway plays a role in EMT and CSC development in NPC.



76 The mammalian target of rapamycin (mTOR) is the principal regulator of growth controlling cell  
77 proliferation, survival, anabolic and catabolic processes in response to nutrients and environment  
78 (10). mTOR exists in two structurally and functionally distinct protein complexes, namely  
79 mTOR complex C1 (mTORC1) that is highly sensitive to rapamycin, and mTOR complex 2  
80 (mTORC2) that is resistant to short-term treatment of rapamycin (11-13). Both mTORC1 and  
81 mTORC2 share several common subunits: the mTOR kinase, mLST8, Deptor, and Tti1/2.  
82 Additionally, each complex has distinct subunits: Raptor and PRAS40 are subunits specific to  
83 mTORC1 (12), while Rictor and mSin1 are unique to mTORC2 (13, 14). mTORC1 is stimulated  
84 by PI3K/AKT and Ras-MAPK cascades and, once activated, phosphorylates EIF-4B binding  
85 protein 1(4E-BP1) and S6 kinase1 (S6K1) to trigger cellular proliferation (11, 12). Although the  
86 function and regulation of mTORC2 are not as well-defined as mTORC1, sufficient evidence  
87 suggests that mTORC2 plays fundamental roles in regulating cell metabolism (15, 16). mTORC2  
88 phosphorylates several AGK kinase family members, including AKT (Ser473), PKC $\alpha$  ( Ser638,  
89 and Ser657 ) and SGK (17). AKT integrates signals from mTORC2 (Ser473) and from PDK1  
90 (Ser318) to promote cell growth and survival and is among the most commonly hyper-activated  
91 proteins in cancers (18). As mTOR signaling is a chief mechanism for controlling cell  
92 proliferation, survival and metabolism, it is not surprising that mTOR signaling is one of the  
93 most frequently activated pathways in cancer (19). Accumulating evidence demonstrated the  
94 involvement of mTOR signaling in cancer initiation, metastasis and resistance to cancer  
95 therapies, suggesting its role in EMT (20, 21).

96 In this study, we investigated the contribution of the mTOR pathway to the generation and  
97 maintenance of CSCs in NPC. shRNA-mediated gene silencing approach and mTOR complex-

98 specific pharmacological inhibitors were used to dissect the function of mTOR or its complexes  
99 in each step of the EMT process that leads to the development of nasopharyngeal cancer stem  
100 cells. Our study indicates that the mTOR pathways are essential for NPC to maintain CSCs and  
101 tumorigenicity, and mTORC1 and mTORC2 play distinct roles in different steps of CSC  
102 development.

## 103 **Results**

### 104 **LMP1 activates the mTOR signaling pathway**

105 Our previous study showed that LMP1 could induce epithelial-to-mesenchymal-transition (EMT)  
106 in NPC, resulting in the generation of cancer stem cells at various states along the epithelial-  
107 mesenchymal spectrum and the acquisition of tumorigenic and metastatic capabilities (6). The  
108 LMP-induced EMT process is accompanied by activation of mTORC1 and mTORC2 pathways  
109 revealed by the up-regulation of mTORC1 and mTORC2 in LMP1-induced  
110 epithelial/mesenchymal (E/M) hybrid and highly mesenchymal (xM) subpopulation (Fig. 1A).  
111 This finding, together with the previous report that LMP1 regulates the mTOR signaling pathway  
112 in NPC (8), prompted us to investigate if LMP1 induces the EMT program and cancer cell  
113 stemness by activating the mTOR pathway. To this end, we first examined the effect of LMP1  
114 expression on the activation status of mTOR components in CNE-2 S26 (S26) and CNE-2 S18  
115 (S18) cells, two clones derived from the same NPC cell line CNE-2 but with different epithelial-  
116 mesenchymal phenotypic states. S18 displays mesenchymal-like (M-like) phenotypes and  
117 possesses great metastasis abilities, while S26 shows epithelial-like (E-like) phenotypes and  
118 produces low invasion and metastasis (22). In both S18 and S26 cells, transient expression of  
119 LMP1 resulted in elevated phosphorylation of mTOR (S2448) and p70S6K (T389) in the

120 mTORC1 pathway in a dose-dependent manner. Furthermore, LMP1 also promoted the  
121 phosphorylation of substrates of mTORC2, including PKC $\alpha$  (S638) and Akt (S473) (Fig. 1B). In  
122 addition, stably expressing LMP1 in S26 and S18 increased phosphorylation of key effectors of  
123 mTORC1 and mTORC2, including Akt (S473), c-Raf (S259), and mTOR (S2448) (Fig. 1C).  
124 Overall, LMP1 induces the activation of mTORC1 and mTORC2 in NPC cells, suggesting an  
125 essential role of mTOR signaling in the regulation of cancer stem cell formation.

126 **LMP1-mediated activation of mTORC1 is responsible for cancer stemness properties of**  
127 **NPC cells.**

128 Cancer stem cells can be identified or isolated based on specific surface and enzyme markers and  
129 characterized by self-renewal ability, differentiation into non-CSC progeny tumor cells, high  
130 tumorigenicity, and resistance to chemotherapy. To define the roles of the mTOR pathway in  
131 NPC cells for the acquisition of stemness and CSC characteristics, we examined the  
132 contributions of mTORC1 and mTORC2 complexes to each of the CSC properties. First, we  
133 determined the effects of the mTOR pathways on cancer cell stemness by following the changes  
134 of mesenchymal marker Vimentin and cancer stem cell marker aldehyde dehydrogenase (ALDH)  
135 in response to the mTORC1 and mTORC2 signalings. We employed a loss-of-function strategy  
136 to determine if mTOR pathways are responsible for expressing the stem cell markers. A short-  
137 hairpin RNA (shRNA) against mTOR was introduced into S18 cells to silence mTOR gene  
138 expression. Also, the functions of mTORC1 and mTORC2 were respectively blocked by using  
139 shRNAs specific to mTOR complex-specific components Raptor (mTORC1) and Rictor  
140 (mTORC2). The efficiency of each shRNA-mediated gene silencing, and the functional  
141 consequence such as the phosphorylation of p70S6K at T389 (a downstream effector of  
142 mTORC1) and AKT at S473 (a core kinase of mTORC2 signaling), were analyzed by Western

143 blot. As shown in Fig. 2A, these shRNAs effectively inhibited the expression of the targeting  
144 mTOR components. The consequence of mTORC1 and mTORC2 knockdown on Vimentin  
145 expression was assessed by Western analysis and IFA. Results showed that loss of mTORC1  
146 function significantly reduced the mesenchymal marker vimentin (Fig. 2B and C).

147 ALDH is an enzyme for the oxidation of intracellular aldehydes and essential for the  
148 maintenance and differentiation of stem/progenitor cells in normal development. ALDH is a  
149 hallmark of cancer stem cells and a prognostic factor of poor clinical outcomes (23, 24). Cells  
150 expressing a high level of ALDH become brightly fluorescent (ALDH<sup>br</sup>), which allows us to  
151 determine the percentage of ALDH<sup>br</sup> cells in S18 and S26 cell populations and the effect of  
152 LMP1 expression on ALDH expression using flow cytometry. S18 and S26 consisted of 12.2%  
153 and 9.54% ALDH<sup>br</sup> cells, respectively, which were significantly reduced when the cells were  
154 treated with a specific inhibitor of ALDH enzyme, Diethylaminobenzaldehyde (DEAB). LMP1  
155 expression increased the ALDH<sup>br</sup> population in a dose-dependent manner in S18 (from 12.2% to  
156 22.6%) and S26 cells (from 9.54% to 17.3%), but the LMP1-mediated increases were diminished  
157 when the cells were treated with PI3K-mTOR dual inhibitor BEZ235 (Fig. 2D). The involvement  
158 of mTOR signaling in the maintenance of ALDH<sup>br</sup> cells was dissected using shRNA-mediated  
159 knockdown of mTOR, Raptor, and Rictor. Results showed that silencing Raptor and mTOR  
160 decreased ALDH<sup>br</sup> cell levels in S18 and S26 cells (Fig. 2E), suggesting mTORC1 is responsible  
161 for the acquisition of ALDH<sup>br</sup> phenotype in NPC. To our surprise, the knockdown of Rictor  
162 increased the population of ALDH<sup>br</sup> cells by nearly 4–5 fold in both S18 and S26 cells (Fig. 2E).  
163 A possible explanation is that block of mTORC2 may lead to the feedback of increased  
164 mTORC1 as revealed by dramatically elevated phosphorylation of p70S6K, a key effector of  
165 mTORC1 (Fig. 2A). Taken together, mTORC1 is essential for maintaining ALDH<sup>br</sup> CSCs in

166 NPC. This notion was also confirmed by treating S18 cells with mTORC1 inhibitor Rapamycin  
167 and PI3K-mTOR dual inhibitor BEZ235, which significantly decreased the ALDH<sup>br</sup> cell  
168 population in S18 (Fig. 2F).

### 169 **Rapamycin-insensitive mTORC1 is essential for CSC drug resistance**

170 One crucial characteristic of CSC is the resistance to chemotherapy, represented by the capacity  
171 of cells to extrude dyes such as Hoechst33342 due to the high expression of ATP-dependent  
172 efflux pumps (25). The cells that extrude the dye and maintain a low fluorescent signal are  
173 referred to as side population (SP) cells. SP cells have been identified in NPC (26). S26 clone of  
174 CNE-2 was found to possess a low percentage of SP cells (3.56%), while S18 clone has a high  
175 population of SP cells (38.7%) (Fig. 3A). Ectopic expression of LMP1 increased the SP cell  
176 population in S26 and S18 cells, but such SP increase diminished when the cells were treated  
177 with mTOR dual inhibitor BEZ235 (Fig. 3B). These data suggest that LMP1-activated mTOR  
178 signaling is crucial for the drug resistance property of CSCs in NPC. To further analyze the role  
179 of mTOR and its complexes in developing a drug-resistant NPC population, we knocked down  
180 the expression of mTOR, Raptor, and Rictor, respectively (Fig. 3C) and analyzed their effects on  
181 the side population. Notably, silencing the expression of either Raptor or mTOR significantly  
182 reduced the side population, while knockdown of Rictor exhibited little change in SP (Fig. 3D),  
183 suggesting that mTORC1 played an essential role in developing drug resistance of NPC.

184 To verify the conclusion, flow cytometry assays for SP cells were performed in EBV-negative  
185 CNE S18 and EBV-positive CNE2 cells (CNE2+) treated with mTORC1 inhibitor Rapamycin  
186 and mTORC1/2 dual inhibitor BEZ235. To our surprise, Rapamycin did not effectively decrease  
187 side population cells. In contrast, BEZ235 significantly reduced SP cells in a dose-dependent

188 manner (Fig. 3E). It was reported that when the rapamycin-insensitive mTORC1 (RI-mTORC1)  
189 complex is activated, rapamycin couldn't block all downstream effectors of mTORC1. In these  
190 cells, although rapamycin decreases the phosphorylation of p70S6K at Thr389, it cannot  
191 effectively block the phosphorylation of 4E-BP1 (27). To see if RI-mTORC1 is activated in NPC,  
192 S18 cells were treated with rapamycin or BEZ235 and analyzed for phosphorylation of p70S6K  
193 and 4E-BP1 by Western blot. Indeed, rapamycin inhibited the phosphorylation of p70S6K, but  
194 not 4E-BP1 (Thr37/46) in S18 cells. BEZ235 completely blocked the phosphorylation of both  
195 p70S6K and 4E-BP1 (Thr37/46) (Fig. 3F), indicating a RI-mTORC1 activity is responsible for  
196 the SP maintenance and drug resistance property of NPC cancer stem cells. We isolated SP and  
197 non-SP cells and examined them for RI-mTORC1 activities. Western blots showed that the  
198 sorted SP cells indeed exhibited higher levels of phosphorylation of 4E-BP1 than non-SP cells  
199 (Fig. 3G).

200 The molecular basis for side population is known to attribute to the ATP-binding cassette sub-  
201 family G member 2 (ABCG2) (28, 29). ABCG2 is a multidrug transporter that protects many  
202 tissues against xenobiotic molecules. ABCG2 was also considered a marker for cancer stem cells,  
203 contributed to multidrug resistance of tumor cells (30). It has been reported that PI3K/mTOR  
204 pathway up-regulates ABCG2 expression to regulate side population phenotype in cancer stem  
205 cells (31). We compared SP and non-SP cells for their ABCG2 expression levels and results  
206 showed that SP cells expressed higher level of ABCG2 transporter compared to non-SP cells  
207 (Fig. 3H). S18 cells, which display a high percentage of side population, also expressed ABCG2  
208 in a higher level compared to S26 that exhibits a low side population. These results indicated that  
209 the fundamental difference between SP and non-SP is the expression level of ABCG2, and

210 mTORC1 regulates ABCG2 expression through the RI-mTOR–4E-BP1–ABCG2 axis to enhance  
211 the drug-efflux pump activity in NPC.

## 212 **mTORC2 is essential for tumor initiation**

213 Another essential characteristic of CSC is tumor initiation capability. Sphere-forming assay is  
214 often used to identify CSCs and study their tumor initiation property (32), which allows us to  
215 investigate how mTOR pathway participates in regulation of tumor initiation capability. We  
216 previously showed that the expression of LMP1 in S26 cells enhanced tumorsphere formation (6).  
217 The LMP-mediated tumorsphere formation diminished when S26-LMP1 cells were treated with  
218 mTOR dual inhibitor BEZ235, while mTORC1 inhibitor rapamycin exhibited little effect in this  
219 phenotype (Fig. 4A). Tumorsphere-forming assays with S18 cells and EBV-positive TW03 cells  
220 (TW03+) cells led to the same conclusion (Fig. 4B). To gain insight into how the mTOR  
221 pathways contribute to the establishment and maintenance of the tumor initiation capability,  
222 mTOR, Raptor and Rictor expression were silenced in S18 and S26 cells by shRNA-mediated  
223 knockdown and analyzed using sphere-forming assay. The result showed that silencing of Rictor  
224 and mTOR significantly or even completely abolished NPC tumorsphere formation, indicating  
225 that mTORC2 is essential for tumor initiation in NPC cells (Fig. 4C and D).

226 To elucidate how mTORC2 influenced NPC's tumor initiation capability, S18 cells and the cells  
227 having mTOR, Raptor, and Rictor silenced were analyzed for the expression of several  
228 pluripotent transcription factors such as Bmi-1, Sox2, KLF4, Nanog, and c-Myc. These markers  
229 have pronounced roles in promoting stemness and driving tumorigenesis and are often used to  
230 characterize CSCs in solid tumors (33, 34). Results revealed that the expression of c-Myc was  
231 down-regulated in the cells where Rictor and mTOR were silenced, suggesting that mTORC2

232 may promote tumor initiation capability of NPC cells by regulating oncogene c-Myc (Fig. 4E). c-  
233 Myc is highly expressed in cancer stem cells relative to non-stem cells and has functions in self-  
234 renewal and differentiation of stem cells (35). The mTORC2/AKT pathway was reported to  
235 regulate c-Myc through Forkhead box O (FoxO), a negative regulator of c-Myc (36). When  
236 mTORC2/AKT signaling is activated, AKT phosphorylates FOXO on discrete residues, leading  
237 to its inactivation and exclusion from the nucleus. Consequently, c-Myc expression is up-  
238 regulated (37, 38). To verify if that is the case in NPC, we examined the effect of silencing of  
239 mTORC2 on phosphorylation of AKT (Ser473) and FoxO1 (Thr24)/FoxO3a (Thr32) by Western  
240 analysis. As shown in Fig. 4E, knockdown of Rictor and mTOR expression led to the down-  
241 regulation of Phospho-FoxO1 (Thr24) and FoxO3a (Thr32) as well as AKT (Ser473).

242 c-Myc activation is a hallmark of cancer initiation and maintenance. When pathologically  
243 activated, c-Myc enforces many of the "hallmark" features of cancer, including increased  
244 stemness, relentless cellular proliferation, and resistance to apoptosis (39). We examined the  
245 effects of the mTORC2–c-Myc axis on NPC cell proliferation and resistance to apoptosis. Using  
246 Annexin-V assay, S18 and the Raptor, Rictor and mTOR knockdown cells were analyzed for cell  
247 apoptosis. Silencing Rictor and mTOR induced explicitly higher extents of apoptosis of S18 cells  
248 (12.94% and 8.72%, respectively) than that of control cells (3.34%) (Fig. 4F). CFSE  
249 (carboxyfluorescein diacetate succinimidyl ester) assay was used to measure cell proliferation  
250 based on dye-dilution in the daughter cells. Results showed that silencing Rictor or mTOR  
251 suppressed S18 cell proliferation compared to silencing Raptor or control vector (Fig. 4G).  
252 Additionally, CFSE assay showed that silencing Rictor preferentially inhibited S18 cells (cancer  
253 stem-like cells) proliferation rather than S26 cells (Fig. 4H). Furthermore, the use of  
254 pharmacological mTOR dual inhibitor BEZ235 also showed that blockade of mTOR signaling



255 preferentially inhibited S18 cell proliferation, while Cisplatin and Rapamycin inhibited S18 and  
256 S26 with same efficiencies (Fig. 4I). Taken together, these data suggest that mTORC2 plays an  
257 essential role in CSC proliferation and can serve a potential target to selectively inhibit cell  
258 proliferation and tumor initiation of nasopharyngeal cancer stem cells.

### 259 **mTORC1 and mTORC2 co-regulate migration and invasion**

260 Cancer stem cells are inherently capable of metastasizing. The expression of LMP1 in S26 cells  
261 render the low migration/invasion cells dramatically higher abilities of migration and invasion  
262 (Fig. 5A). The migration and invasion could be blocked by the treatment with mTORC1/2 dual  
263 inhibitor BEZ235 in LMP1-expressing S26 cells and S18 cells, while mTORC1 inhibitor  
264 rapamycin showed limited inhibitory effect (Fig. 5A and B). To further explore the role of the  
265 mTOR signaling in NPC metastasis, we analyzed S18 cells for the ability of migration and  
266 invasion as well as functional consequences of silencing of mTORC1 and mTORC2 functions *in*  
267 *vitro* using wound healing test and Transwell invasion assay. Silencing either Rictor or Raptor  
268 could not reduce migration and invasion abilities of S18 cells but knocking down mTOR  
269 expression significantly inhibits migration and invasion (Fig. 5C–E). Therefore, these data  
270 suggest that mTORC1 and mTORC2 regulate migration and invasion either with some  
271 overlapped functions or by coordinating a common signal pathway.

### 272 **Inhibition of mTOR pathway tampers tumor growth *in vivo***

273 The essential roles of mTORC1 and mTORC2 pathways in the generation and maintenance of  
274 NPC cancer stem cells informs that mTOR can serve as an effective drug target and mTOR  
275 inhibitors have potentials to be used to treat advanced NPC. To validate the potential, we tested  
276 if blocking the mTOR pathway can inhibit NPC tumor progression *in vivo*. CNE-2 S18 cells and

277 the cells in that mTOR, Raptor, and Rictor were respectively silenced by specific shRNAs were  
278 transplanted into BALB/C-nu/nu mice to test their tumorigenic ability *in vivo*. Tumors were  
279 stripped after 30 days. We found that silencing either mTORC1 or mTORC2 effectively  
280 decreased tumor weight (Fig. 6A). These tumors were analyzed by hematoxylin-eosin (H&E)  
281 staining, immunohistochemistry (IHC) assay for Ki67 and TUNEL staining. The expression of  
282 Ki67 is strongly associated with tumor cell growth and serves as a proliferation marker. TUNEL  
283 staining is used to identify apoptotic cells in tissue based on the labeling of DNA strand breaks.  
284 Results showed that silencing mTOR, Raptor and Rictor significantly decreased Ki67 positive  
285 cells and increased apoptotic cells (Fig. 6B), suggesting that lack of mTOR function decreased  
286 cell proliferation and tumor growth *in vivo*. Additionally, S18-xenograft mice were treated with  
287 mTOR dual inhibitor BEZ235 for 21 days. We found that BEZ235 significantly inhibited the  
288 growth of formed tumors (Fig. 6C–E) but had little effect on the body weight of the treated mice  
289 (Fig. 6F). Taken together, mTORC1 and mTORC2 are required for tumor growth and malignant  
290 process, and inhibition of their functions leads to delayed growth.

291 In summary, we dissected the roles of distinct mTORC1 and C2 signaling in maintenance of  
292 cancer stem cells in NPC. (i) mTORC1 signaling controlled chemotherapy resistance feature of  
293 SP population through improving the phosphorylation of 4E-BP1 and increasing ATP-dependent  
294 efflux pump ABCG2 in NPC cells. (ii) mTORC2 signaling maintained tumor initiation capability  
295 of CSCs through up-regulating c-Myc expression. (iii) Both mTORC1 and mTORC2 can  
296 promote the ability of cell migration and invasion of NPC. A model for these functions of the  
297 mTOR pathways in regulating nasopharyngeal cancer stem cell characteristics is illustrated in  
298 Fig. 7.

## 299 **Discussion**

300 The vast majority of NPC is the undifferentiated type with invasive and metastatic propensity (40,  
301 41). Recently EMT, which contributes to the generation of cancer stem cells, has emerged as a  
302 critical step in cancer initiation, progression, and metastasis (42). Although evidence has  
303 suggested that EBV oncogenic proteins LMP1 and LMP2A play crucial roles in the EMT  
304 process, as indicated by their up-regulating EMT transcription factor Twist and Snails (5), as  
305 well as CSC generation in NPC (43, 44), how LMP1 and LMP2A regulate the EMT process and  
306 contribute to each of the CSC tumorigenic properties, such as tumor initiation,  
307 migration/invasion, and resistance to anticancer therapies, remains largely unknown. Previous  
308 investigations have identified many signal transduction pathways and transcription regulators  
309 that can be modulated by LMP1 or LMP2A including TGF- $\beta$ , mTORC1/NF- $\kappa$ B, ERK-MAPK,  
310 and EMT transcription factors twist, snails and Ets1 (9, 45-51). Besides, evidence indicates that  
311 mTOR signaling is required for the EMT induction and CSCs maintenance in NPC, and  
312 mTORC1 inhibitor rapamycin has a certain degree of inhibitory effect on nasopharyngeal cancer  
313 stem cell characteristics (52, 53). These findings compelled us to explore the role of EBV LMPs  
314 in mTOR promoting EMT to generate highly tumorigenic NPC cells with cancer stem cell  
315 properties. In the current study, we found that LMP1 activated both mTORC1 and mTORC2  
316 signaling pathways that play essential roles in acquiring CSC tumorigenic characteristics,  
317 including tumor initiation, metastasis, and therapeutic resistance. Our study showed that  
318 mTORC1 and mTORC2 have distinct functions responsible for different tumorigenic properties,  
319 respectively.

320 PI3K-mTOR signaling is one of the most frequently activated pathways in cancer (19), playing  
321 roles in tumorigenesis of many aspects including tumor cell proliferation and survival,  
322 migration/metastasis and antitumor therapy resistance (20, 21). Recently, the roles of

323 PI3K/mTOR in cancer stem cell establishment have emerged (54-56). Activation of PI3K/mTOR  
324 enriched CSCs in breast cancer (55) and blockage of PI3K/mTOR signaling by dual inhibitor  
325 VS-5584 preferentially inhibits proliferation and survival of CSCs (56). Our current study  
326 confirmed the involvement of mTOR signaling in CSC development in NPC and dissect the roles  
327 of distinct signaling (mTORC1 and mTORC2) in the acquisition of different CSC characteristics  
328 (schematically illustrated in Fig. 7). (i) Side population (SP), which represents the chemotherapy  
329 resistance feature of CSC, was found to be controlled by mTORC1 signaling in NPC. The  
330 mTOR signaling pathway has been implicated in multiple anticancer drug resistance mechanisms  
331 as many mutations and activation of signaling upstream of mTOR (such as PI3K and AKT)  
332 confer drug resistance in various cancers (breast cancer, prostate cancer, etc.) (57). It is likely  
333 that the drug resistance property in these cancers is eventually attributed to the mTORC1  
334 function. (ii) Tumor initiation capability is mainly dependent on activated mTORC2 that  
335 provides NPC with the capabilities of proliferation and survival through activating c-Myc. c-Myc  
336 is an important transcriptional regulator in embryonic stem cells (ESCs), somatic cell  
337 reprogramming and cancer. As an unique ESC module, c-Myc drives a transcription program  
338 common to ESCs and cancer cells (58). Therefore, mTORC2–c-Myc axis is certainly a primary  
339 regulator for maintaining cancer stem cell and tumor initiation property. (iii) Both mTORC1 and  
340 mTORC2 can promote the ability of cell migration and invasion of NPC cells. This suggests that  
341 mTORC1 and mTORC2 signaling may have overlapped functions or they coordinately control a  
342 common pathway. The role of mTORC1 in tumor cell motility, invasion and metastasis has been  
343 long recognized in many tumors and cell lines (20, 59-62). Recently, the involvement of  
344 mTORC2 in regulation of cell motility and metastasis has also been reported (63, 64). SNAIL,  
345 which is known to play an essential role in cell migration, invasion and metastasis and can be

346 positively regulated by mTORC1 via enhancing its translation, was recently found to be  
347 controlled by mTORC2 as well through suppressing its ubiquitin-mediated degradation (64).  
348 Both mTORC1 and mTORC2 signaling repress E-cadherin via activation of SNAIL. Another  
349 important regulatory mechanism in cell migration, invasion and metastasis involves activation of  
350 Rho GTPase family (65). Both mTORC1 and mTORC2 regulate the activities of these proteins  
351 (63). mTORC1-mediated 4E-BP1 and S6K1 pathways are essential for the expression of some  
352 Rho GTPases (RhoA, CDC42 and Rac1), and the actin organization function of Rho GTPases is  
353 controlled by mTORC2 (66, 67). The coordinated regulation of NPC tumorigenesis and cancer  
354 stem cell generation by mTORC1 and mTORC2 is summarized in the schematic illustration in  
355 Fig. 7. Further investigation is warranted to elucidate the detailed mechanisms of how mTOR  
356 signaling controls the development of each CSC characteristics in NPC.

357 The revelation of the roles of mTOR signaling in nasopharyngeal cancer stem cell establishment  
358 has implications for therapeutic strategies to treat NPC, especially relapsed and metastatic NPC,  
359 by targeting its cancer stem cells using mTOR inhibitors. A thorough comprehension of the roles  
360 of different mTOR signaling pathways in distinct tumorigenic features will provide a guideline  
361 for designing efficient therapies by choosing specific mTOR inhibitors. For instance, it was  
362 shown that mTORC1 inhibitor rapamycin could reduce the side population (SP) cells in breast  
363 cancer MCF7 cells (54). However, in our study, rapamycin failed to reduce the SP subpopulation  
364 in NPC CEN-2 cells. We believe that this discrepancy results from the activation of the  
365 rapamycin-insensitive (RI) mTORC1 pathway in CEN-2 cells; therefore, the inhibitors that can  
366 block the RI-mTOR pathway should be used to treat NPC. Indeed, SP cells can be efficiently  
367 eliminated when CNE-2 cells were treated with PI3K/mTOR dual inhibitor BEZ-235 (Fig. 4). In  
368 addition, given the crucial roles of mTORC2 in regulating tumor initiation, the discovery of new

369 inhibitors, specifically targeting mTORC2, becomes an important and urgent task in new cancer  
370 drug development. Recently we identified an mTORC2 potential inhibitor, namely Manassantin  
371 B, from the roots of *Saururus chinensis* and found that it can effectively inhibit EBV lytic  
372 replication with low cytotoxicity (68). Thus, further study is warranted to evaluate the potential  
373 of Manassantin B in inhibition of CSC and the treatment of EBV-associated NPC. Furthermore,  
374 our results suggest that cell migration and invasion, which reflects cancer metastatic ability, can  
375 be suppressed when both mTORC1 and mTORC2 functions are knocked down or inhibited.  
376 Therefore, mTORC1 and mTORC2 dual inhibitors (such as BEZ-235 and VS-5584) could be a  
377 better choice for CSC-targeted treatment of NPC to reduce metastasis and achieve durable  
378 remission.

## 379 **Materials and Methods**

### 380 **Ethics statement**

381 All animal works were approved by the IACUC of SYSU Zhongshan School of Medicine  
382 (No.2017-196). The experiment number is North-D2019-0064. Experiments were carried out  
383 under the institutional guidelines of caring laboratory animals, published by the ministry of  
384 Science and Technology of People's Republic of China.

### 385 **Cells and chemicals**

386 CNE2-S18 (S18) cells and CNE2-S26 (S26) cells were obtained from Dr. Mu-Sheng Zeng at  
387 Sun Yat-sen University Cancer Center, and S18-LMP1 cells and S26-LMP1 cells were  
388 established as described previously (6). They were maintained in RPMI 1640 medium  
389 supplemented with 5% fetal bovine serum (FBS, Gibco® Life Technologies, #10270-106).

390 Human embryonic kidney (HEK) 293T cells, purchased from American Type Culture Collection  
391 (ATCC), were grown in Eagle's medium (DMEM) supplemented with 10% FBS. All cultures  
392 contained 100U/ml penicillin-streptomycin (HyClone Cat# SV30010).

### 393 **Antibodies**

394 Antibodies against mTOR signaling pathways have been described in our previous study (68).  
395 Antibodies against Vimentin (Cat#5741), Snail (Cat #3879), ZEB1 (Cat #3396), SOX2 (Cat  
396 #3579), E-Cadherin (Cat #14472), TWIST1 (Cat #46702), KLF4 (Cat #12173), Nanog (Cat  
397 #8822), BMI1(Cat #6964), c-MYC (Cat #18583), Phospho-FoxO1 (Thr24)/FoxO3a (Thr32) (Cat  
398 #9464), FoxO1 (Cat #2880), Phospho-4E-BP1 (Thr37/46) (Cat #2855), 4E-BP1 (Cat #9644)  
399 were purchased from Cell Signal Technologies. Antibody against EBV Latent Membrane Protein  
400 1 was purchased from abcam (Cat#ab78113).

### 401 **Plasmids**

402 Plasmid pcDNA3.1-LMP1 and control vector were kindly provided by Dr. Bijun Huang at Sun  
403 Yat-sen University Cancer Center. The pLKO.1-shRNA lentiviral vectors targeting mTOR  
404 (Clone ID: NM\_004958.2-5477s1c1), Raptor (Clone ID: NM\_020761.1-4689s1c1), Rictor  
405 (CloneID: NM\_152756.2-2620s1c1), as well as pLKO.1-shCTR plasmid, psPAX2 plasmid, and  
406 pMD2.G were purchased from Sigma-Aldrich.

### 407 **Western blot**

408 Cells were lysed with cell lysis buffer [50 mM Tris-HCl, pH 7.4, 150 mM NaCl, 1% NP-40, 1  
409 mM sodium orthovanadate ( $\text{Na}_3\text{VO}_4$ ), 20 mM sodium pyrophosphate, 100 mM sodium fluoride,  
410 10% glycerol, protease inhibitor cocktail (1 tablet in 50 mL lysis buffer)]. For nuclear protein

411 detection, RIPA strong lysis buffer (containing 1% NP-40 and 1% Triton X-100) was used.  
412 Whole cell lysates were prepared by homogenization and centrifugation at 13,000 rpm for 10  
413 min at 4°C. The whole cell extracts of 50 µg protein was resolved by SDS-PAGE and transferred  
414 onto nitrocellulose membranes. The membranes were blocked in 5% non-fat milk in 1×PBS for 1  
415 h, and then incubated in diluted primary antibodies overnight at 4°C. IRDye 680LT and 800CW  
416 goat anti-rabbit IgG or anti-mouse IgG antibodies (LI-COR Biosciences) was used as secondary  
417 antibody. An Odyssey system (LI-COR) was used for detection of proteins of interest.

#### 418 **ShRNA-mediated gene silencing**

419 The pLKO.1-shRNA lentiviral plasmids targeting mTOR, Raptor and Rictor, as well as pLKO.1-  
420 shCTR lentiviral plasmid, were co-transfected with packaging plasmids psPAX2 and pMD2.G  
421 into HEK293T cells. After 72 hours, Media containing lentiviral particles were harvested and  
422 subjected to ultracentrifuge to concentrate lentiviruses. S18 cells were transduced with these  
423 lentiviruses and selected with 2 µg/ml puromycin for 7 days.

#### 424 **Immunofluorescence assay (IFA)**

425 Cells were grown on glass coverslips (NEST) for 48 hours. After washing with 1xPBS, cells  
426 were fixed using 4% paraformaldehyde for 10 min, permeabilized in 0.1% Triton X-100 for 30  
427 min and blocked in 1% BSA for 1 hour. Then the fixed cells were incubated with anti-Vimentin  
428 (1:100 dilution) Antibody for 1 hour at room temperature. Fluor Alexa-555 conjugated anti  
429 Rabbit IgG (Life Technologies, 1:200 dilution) was used as secondary antibody. Slides were  
430 visualized by Zeiss LSM780 confocal laser scanning system.

#### 431 **Side population (SP) assay**



432 Cells were digested with 0.25% trypsin, washed twice using 1xPBS, and resuspended in RPMI  
433 1640 medium supplement with 2% FBS in a concentration of  $1 \times 10^6$  cells/ml. Hoechst 33342  
434 was added to the cells in a final concentration of 5  $\mu\text{g/ml}$  and incubated for 90 minutes in the  
435 dark with periodic mixing at  $37^\circ\text{C}$ . Cells were then washed twice with cold 1xPBS and kept on  
436 ice for analyzing by BD LSRFortessa.

#### 437 **Aldehyde dehydrogenase (ALDH) assay**

438 ALDEFLUOR kit (StemCell technologies Cat #01700) was used for identification of cancer  
439 stem cells that express high levels of ALDH. Cells were incubated with ALDEFLUOR assay  
440 buffer containing ALDEFLUOR reagent ( $1 \times 10^6$  cells/ml). Cells treated with DEAB reagent was  
441 used as a negative control. The samples were incubated at  $37^\circ\text{C}$  for 45 min, and then  
442 resuspended in ALDEFLUOR assay buffer on ice for analyzing using BD LSRFortessa and  
443 CytoFLEX Flow Cytometer.

#### 444 **Annexin V Apoptosis Assay**

445 S18 cells and cells with Raptor, Rictor or mTOR silenced were collected for apoptosis assay  
446 using PE Annexin V Apoptosis Detection Kit I (BD Biosciences Cat#559763). Cells were  
447 analyzed using CytoFLEX Flow Cytometer.

#### 448 **Transwell migration and invasion assays**

449 Cell migration assay and invasion were carried out in 24-well Transwell units (Corning  
450 Cat#3422). For a migration assay,  $10^5$  cells in 100  $\mu\text{l}$  of serum-free RPMI1640 medium were  
451 placed in the top chamber of Transwell. For an invasion assay, 50  $\mu\text{l}$  of diluted matrigel was  
452 added to each upper chamber insert of Transwell and the well was incubated at  $37^\circ\text{C}$  for 2 hours.

453 Cells ( $10^5$  in 100  $\mu$ l of serum-free RPMI1640 medium, starved for 24 hours) were placed in the  
454 top chamber of Transwell. The bottom chambers were filled with 600  $\mu$ l RPMI 1640 medium  
455 with 20% FBS. After incubation at 37°C for 20 hours, cells that have passed through the matrigel  
456 were fixed with ethanol and stained with crystal violet. The number of migrated cells was  
457 counted from multiple randomly selected microscopic visual fields using ImageJ software.  
458 Photographs were taken and independent experiments were performed in triplicate.

#### 459 **MTT assay for cell viability**

460 Cell viability of CNE2 S18 and CNE2 S26 cells after exposed to different chemical compounds  
461 was determined by the MTT assay. Cells, seeded into 96-well plates in 200  $\mu$ l complete RPMI  
462 1640 medium, were treated with Cisplatin, Rapamycin or BEZ235 at various concentrations at  
463 37°C for 72 hours. 20  $\mu$ l of 5mg/ml MTT [3-(4,5-dimethylthiazol-2-yl)-2,5-diphenyltetrazolium  
464 bromide] (Sigma) was added to each well. After 4 hours incubation, the culture medium of each  
465 well was discarded, and formazan solubilized in 150  $\mu$ l DMSO was added. The absorbance of  
466 each well was measured at 570 nm. The mean optical density of three wells in treatment groups  
467 was used to calculate the percentage of cell viability as follows: Relative cell viability =  $(A_{\text{treatment}} - A_{\text{blank}}) / (A_{\text{control}} - A_{\text{blank}})$  (A = absorbance). The dose response curves were analyzed by  
468 GraphPad Prism using the equation "log (inhibitor) vs. response".  
469

#### 470 **CFSE cell proliferation assay**

471 S18-shCtr, S18-shRaptor, S18-shRictor and S18-shmTOR cells stained with CellTrace CFSE  
472 Cell Proliferation Kit (Invitrogen Cat#C34554) and cultured for 5 days. Cells were analyzed  
473 using CytoFLEX Flow Cytometer with 488nm excitation and a 530/30nm emission filter.

474 **Tumorsphere formation assay**

475 Tumorsphere formation assay were carried out in ultra-low attachment multiple well plate  
476 (Corning® Costar® Cat#CLS3471). 100 cells in 2 ml of tumorsphere medium (serum-free  
477 DMEM/F12 medium supplemented with B27, 20 µg/ml EGF and 10 µg/ml bFGF) were loaded  
478 into each well. After 10 days incubation, tumorspheres were counted and visualized by Zeiss cell  
479 observe Z1. Experiments were carried out in triplicate with at least three replicates per  
480 concentration.

481 **Cell migration assay**

482 Cell migration was measured using the wound healing assay. Cells were seeded into 12-well  
483 plates in a density of  $2 \times 10^5$  cells per well and cultured until confluent. The cell monolayer was  
484 scratched using a yellow pipette tip and washed twice with 1x PBS then changed the medium to  
485 serum free RPMI 1640 medium. Initial images of three independent areas after each scratch were  
486 acquired at time zero. Images of the same area were captured again after incubation at 37°C for  
487 20 hours.

488 **Tumor xenograft experiment**

489 BALB/C-nu/nu mice were purchased from the Laboratory Animal Center of Sun Yat-Sen  
490 University. Tumor cells were suspended in 200 µl of diluted matrigel (1:8 diluted with PBS) and  
491 inoculated subcutaneously into the right flanks of 4-5 weeks old mice at  $5 \times 10^5$  cells/animal. 3  
492 days after injection, mice were randomly divided into three groups and treated with vehicles or  
493 BEZ235 in a dose of 25 or 45 mg/kg by daily intragastric administration. The tumor volumes

494 were measured using a vernier caliper every other day. The tumor weights were measured at 20  
495 days after injection.

#### 496 **Histological analyses**

497 Tissue processing, Hematoxylin and eosin (H&E) staining and Immunohistochemistry (IHC)  
498 staining were performed as described previously (69). TUNEL staining was performed using the  
499 DeadEnd™ Colorimetric TUNEL System (Promega, Part Numbers: G7130 and G7360) per the  
500 manufacture's protocol. Photomicrographs were acquired using a Zeiss cell observe Z1.

#### 501 **Statistical Analysis**

502 The Student's unpaired t-test was used to compare the data from two study groups. A P value  
503 <0.05 (\* denotes a P value<0.05, show 4 significant digits) was used to determine statistical  
504 significance. Error bars represent the SD (Standard Deviation). Data was analyzed by GraphPad  
505 Prism.

#### 506 **Acknowledgment**

507 We thank all members of Yuan Lab for critical reading of this manuscript and helpful discussion.  
508 This study was supported by the National Natural Science Foundation of China (NSFC  
509 81772177).

#### 510 **References**

511 1. Young LS, Dawson CW. 2014. Epstein-Barr virus and nasopharyngeal carcinoma. *Chin J*  
512 *Cancer* 33:581-90.

- 513 2. Pathmanathan R, Prasad U, Chandrika G, Sadler R, Flynn K, Raab-Traub N. 1995.  
514 Undifferentiated, nonkeratinizing, and squamous cell carcinoma of the nasopharynx.  
515 Variants of Epstein-Barr virus-infected neoplasia. *Am J Pathol* 146:1355-67.
- 516 3. Sun X, Su S, Chen C, Han F, Zhao C, Xiao W, *et al.* 2014. Long-term outcomes of  
517 intensity-modulated radiotherapy for 868 patients with nasopharyngeal carcinoma: an  
518 analysis of survival and treatment toxicities. *Radiother Oncol* 110:398-403.
- 519 4. Tsao SW, Tramoutanis G, Dawson CW, Lo AK, Huang DP. 2002. The significance of  
520 LMP1 expression in nasopharyngeal carcinoma. *Semin Cancer Biol* 12:473-87.
- 521 5. Horikawa T, Yang J, Kondo S, Yoshizaki T, Joab I, Furukawa M, *et al.* 2007. Twist and  
522 epithelial-mesenchymal transition are induced by the EBV oncoprotein latent membrane  
523 protein 1 and are associated with metastatic nasopharyngeal carcinoma. *Cancer Res*  
524 67:1970-8.
- 525 6. Zhu N, Xu X, Wang Y, Zeng MS, Yuan Y. 2021. EBV latent membrane proteins  
526 promote hybrid epithelial-mesenchymal and extreme mesenchymal states of  
527 nasopharyngeal carcinoma cells for tumorigenicity. *PLoS Pathog* 17:e1009873.
- 528 7. Xiang T, Lin YX, Ma W, Zhang HJ, Chen KM, He GP, *et al.* 2018. Vasculogenic  
529 mimicry formation in EBV-associated epithelial malignancies. *Nat Commun* 9:5009.
- 530 8. Chen J, Hu CF, Hou JH, Shao Q, Yan LX, Zhu XF, *et al.* 2010. Epstein-Barr virus  
531 encoded latent membrane protein 1 regulates mTOR signaling pathway genes which  
532 predict poor prognosis of nasopharyngeal carcinoma. *J Transl Med* 8:30.
- 533 9. Zhang J, Jia L, Lin W, Yip YL, Lo KW, Lau VMY, *et al.* 2017. Epstein-Barr Virus-  
534 Encoded Latent Membrane Protein 1 Upregulates Glucose Transporter 1 Transcription  
535 via the mTORC1/NF- $\kappa$ B Signaling Pathways. *J Virol* 91:e02168-16.
- 536 10. Saxton RA, Sabatini DM. 2017. mTOR Signaling in Growth, Metabolism, and Disease.  
537 *Cell* 168:960-976.
- 538 11. Sabatini DM. 2006. mTOR and cancer: insights into a complex relationship. *Nat Rev*  
539 *Cancer* 6:729-34.
- 540 12. Kim DH, Sarbassov DD, Ali SM, King JE, Latek RR, Erdjument-Bromage H, *et al.* 2002.  
541 mTOR interacts with raptor to form a nutrient-sensitive complex that signals to the cell  
542 growth machinery. *Cell* 110:163-75.

- 543 13. Sarbassov DD, Ali SM, Kim DH, Guertin DA, Latek RR, Erdjument-Bromage H, *et al.*  
544 2004. Rictor, a novel binding partner of mTOR, defines a rapamycin-insensitive and  
545 raptor-independent pathway that regulates the cytoskeleton. *Curr Biol* 14:1296-302.
- 546 14. Frias MA, Thoreen CC, Jaffe JD, Schroder W, Sculley T, Carr SA, *et al.* 2006. mSin1 is  
547 necessary for Akt/PKB phosphorylation, and its isoforms define three distinct mTORC2s.  
548 *Curr Biol* 16:1865-70.
- 549 15. Zinzalla V, Stracka D, Oppliger W, Hall MN. 2011. Activation of mTORC2 by  
550 association with the ribosome. *Cell* 144:757-68.
- 551 16. Gaubitz C, Prouteau M, Kusmider B, Loewith R. 2016. TORC2 Structure and Function.  
552 *Trends Biochem Sci* 41:532-545.
- 553 17. Su B, Jacinto E. 2011. Mammalian TOR signaling to the AGC kinases. *Crit Rev Biochem*  
554 *Mol Biol* 46:527-47.
- 555 18. Sarbassov DD, Guertin DA, Ali SM, Sabatini DM. 2005. Phosphorylation and Regulation  
556 of Akt/PKB by the Rictor-mTOR Complex. *Science* 307:1098-1101.
- 557 19. Zhang Y, Kwok-Shing Ng P, Kucherlapati M, Chen F, Liu Y, Tsang YH, *et al.* 2017. A  
558 Pan-Cancer Proteogenomic Atlas of PI3K/AKT/mTOR Pathway Alterations. *Cancer Cell*  
559 31:820-832.e3.
- 560 20. Hsieh AC, Liu Y, Edlind MP, Ingolia NT, Janes MR, Sher A, *et al.* 2012. The  
561 translational landscape of mTOR signalling steers cancer initiation and metastasis. *Nature*  
562 485:55-61.
- 563 21. Weiler M, Blaes J, Pusch S, Sahm F, Czabanka M, Luger S, *et al.* 2014. mTOR target  
564 NDRG1 confers MGMT-dependent resistance to alkylating chemotherapy. *Proc Natl*  
565 *Acad Sci U S A* 111:409-14.
- 566 22. Qian CN, Berghuis B, Tsarfaty G, Bruch M, Kort EJ, Ditlev J, *et al.* 2006. Preparing the  
567 "soil": the primary tumor induces vasculature reorganization in the sentinel lymph node  
568 before the arrival of metastatic cancer cells. *Cancer Res* 66:10365-76.
- 569 23. Ginestier C, Hur MH, Charafe-Jauffret E, Monville F, Dutcher J, Brown M, *et al.* 2007.  
570 ALDH1 is a marker of normal and malignant human mammary stem cells and a predictor  
571 of poor clinical outcome. *Cell Stem Cell* 1:555-67.
- 572 24. Li W, Ma H, Zhang J, Zhu L, Wang C, Yang Y. 2017. Unraveling the roles of  
573 CD44/CD24 and ALDH1 as cancer stem cell markers in tumorigenesis and metastasis.  
574 *Sci Rep* 7:13856.

- 575 25. Richard V, Nair MG, Santhosh Kumar TR, Pillai MR. 2013. Side population cells as  
576 prototype of chemoresistant, tumor-initiating cells. *Biomed Res Int* 2013:517237-517237.
- 577 26. Wang J, Guo LP, Chen LZ, Zeng YX, Lu SH. 2007. Identification of cancer stem cell-  
578 like side population cells in human nasopharyngeal carcinoma cell line. *Cancer Res*  
579 67:3716-24.
- 580 27. Feldman ME, Apsel B, Uotila A, Loewith R, Knight ZA, Ruggero D, Shokat KM. 2009.  
581 Active-site inhibitors of mTOR target rapamycin-resistant outputs of mTORC1 and  
582 mTORC2. *PLoS Biol* 7:e38.
- 583 28. Zhou S, Schuetz JD, Bunting KD, Colapietro AM, Sampath J, Morris JJ, *et al.* 2001. The  
584 ABC transporter Bcrp1/ABCG2 is expressed in a wide variety of stem cells and is a  
585 molecular determinant of the side-population phenotype. *Nat Med* 7:1028-34.
- 586 29. Dou J, Jiang C, Wang J, Zhang X, Zhao F, Hu W, *et al.* 2011. Using ABCG2-molecule-  
587 expressing side population cells to identify cancer stem-like cells in a human ovarian cell  
588 line. *Cell Biol Int* 35:227-34.
- 589 30. Taylor NMI, Manolaridis I, Jackson SM, Kowal J, Stahlberg H, Locher KP. 2017.  
590 Structure of the human multidrug transporter ABCG2. *Nature* 546:504-509.
- 591 31. Bleau AM, Hambardzumyan D, Ozawa T, Fomchenko EI, Huse JT, Brennan CW,  
592 Holland EC. 2009. PTEN/PI3K/Akt pathway regulates the side population phenotype and  
593 ABCG2 activity in glioma tumor stem-like cells. *Cell Stem Cell* 4:226-35.
- 594 32. Ponti D, Costa A, Zaffaroni N, Pratesi G, Petrangolini G, Coradini D, *et al.* 2005.  
595 Isolation and in vitro propagation of tumorigenic breast cancer cells with stem/progenitor  
596 cell properties. *Cancer Res* 65:5506-11.
- 597 33. Koh SP, Brasch HD, de Jongh J, Itinteang T, Tan ST. 2019. Cancer stem cell  
598 subpopulations in moderately differentiated head and neck cutaneous squamous cell  
599 carcinoma. *Heliyon* 5:e02257.
- 600 34. Müller M, Hermann PC, Liebau S, Weidgang C, Seufferlein T, Kleger A, Perkhofer L.  
601 2016. The role of pluripotency factors to drive stemness in gastrointestinal cancer. *Stem*  
602 *Cell Res* 16:349-57.
- 603 35. Wilson A, Murphy MJ, Oskarsson T, Kaloulis K, Bettess MD, Oser GM, *et al.* 2004. c-  
604 Myc controls the balance between hematopoietic stem cell self-renewal and  
605 differentiation. *Genes Dev* 18:2747-63.

- 606 36. Peck B, Ferber EC, Schulze A. 2013. Antagonism between FOXO and MYC Regulates  
607 Cellular Powerhouse. *Front Oncol* 3:96.
- 608 37. Brunet A, Bonni A, Zigmond MJ, Lin MZ, Juo P, Hu LS, *et al.* 1999. Akt promotes cell  
609 survival by phosphorylating and inhibiting a Forkhead transcription factor. *Cell* 96:857-  
610 68.
- 611 38. Wilhelm K, Happel K, Eelen G, Schoors S, Oellerich MF, Lim R, *et al.* 2016. FOXO1  
612 couples metabolic activity and growth state in the vascular endothelium. *Nature* 529:216-  
613 20.
- 614 39. Gabay M, Li Y, Felsner DW. 2014. MYC activation is a hallmark of cancer initiation and  
615 maintenance. *Cold Spring Harb Perspect Med* 4:a014241.
- 616 40. Lo KW, To KF, Huang DP. 2004. Focus on nasopharyngeal carcinoma. *Cancer Cell*  
617 5:423-8.
- 618 41. Tao Q, Chan AT. 2007. Nasopharyngeal carcinoma: molecular pathogenesis and  
619 therapeutic developments. *Expert Rev Mol Med* 9:1-24.
- 620 42. Shibue T, Weinberg RA. 2017. EMT, CSCs, and drug resistance: the mechanistic link  
621 and clinical implications. *Nat Rev Clin Oncol* 14:611-629.
- 622 43. Kondo S, Wakisaka N, Muramatsu M, Zen Y, Endo K, Muroto S, *et al.* 2011. Epstein-  
623 Barr virus latent membrane protein 1 induces cancer stem/progenitor-like cells in  
624 nasopharyngeal epithelial cell lines. *J Virol* 85:11255-64.
- 625 44. Kong QL, Hu LJ, Cao JY, Huang YJ, Xu LH, Liang Y, *et al.* 2010. Epstein-Barr virus-  
626 encoded LMP2A induces an epithelial-mesenchymal transition and increases the number  
627 of side population stem-like cancer cells in nasopharyngeal carcinoma. *PLoS Pathog*  
628 6:e1000940.
- 629 45. Kim KR, Yoshizaki T, Miyamori H, Hasegawa K, Horikawa T, Furukawa M, *et al.* 2000.  
630 Transformation of Madin-Darby canine kidney (MDCK) epithelial cells by Epstein-Barr  
631 virus latent membrane protein 1 (LMP1) induces expression of Ets1 and invasive growth.  
632 *Oncogene* 19:1764-71.
- 633 46. Kang Y, Massagué J. 2004. Epithelial-mesenchymal transitions: twist in development  
634 and metastasis. *Cell* 118:277-9.
- 635 47. Dawson CW, Laverick L, Morris MA, Tramoutanis G, Young LS. 2008. Epstein-Barr  
636 virus-encoded LMP1 regulates epithelial cell motility and invasion via the ERK-MAPK  
637 pathway. *J Virol* 82:3654-64.



- 638 48. Morris MA, Young LS, Dawson CW. 2008. DNA tumour viruses promote tumour cell  
639 invasion and metastasis by deregulating the normal processes of cell adhesion and  
640 motility. *Eur J Cell Biol* 87:677-97.
- 641 49. Sides MD, Klingsberg RC, Shan B, Gordon KA, Nguyen HT, Lin Z, *et al.* 2011. The  
642 Epstein-Barr virus latent membrane protein 1 and transforming growth factor-- $\beta$ 1  
643 synergistically induce epithelial--mesenchymal transition in lung epithelial cells. *Am J*  
644 *Respir Cell Mol Biol* 44:852-62.
- 645 50. Horikawa T, Yang J, Kondo S, Yoshizaki T, Joab I, Furukawa M, *et al.* 2007. Twist and  
646 Epithelial-Mesenchymal Transition Are Induced by the EBV Oncoprotein Latent  
647 Membrane Protein 1 and Are Associated with Metastatic Nasopharyngeal Carcinoma.  
648 *Cancer Res* 67:1970-8.
- 649 51. Horikawa T, Yoshizaki T, Kondo S, Furukawa M, Kaizaki Y, Pagano JS. 2011. Epstein-  
650 Barr Virus latent membrane protein 1 induces Snail and epithelial--mesenchymal  
651 transition in metastatic nasopharyngeal carcinoma. *Br J Cancer* 104:1160-7.
- 652 52. Wang MH, Sun R, Zhou XM, Zhang MY, Lu JB, Yang Y, *et al.* 2018. Epithelial cell  
653 adhesion molecule overexpression regulates epithelial-mesenchymal transition, stemness  
654 and metastasis of nasopharyngeal carcinoma cells via the PTEN/AKT/mTOR pathway.  
655 *Cell Death Dis* 9:2.
- 656 53. Yang C, Zhang Y, Zhang Y, Zhang Z, Peng J, Li Z, *et al.* 2015. Downregulation of  
657 cancer stem cell properties via mTOR signaling pathway inhibition by rapamycin in  
658 nasopharyngeal carcinoma. *Int J Oncol* 47:909-17.
- 659 54. Zhou J, Wulfkuhle J, Zhang H, Gu P, Yang Y, Deng J, *et al.* 2007. Activation of the  
660 PTEN/mTOR/STAT3 pathway in breast cancer stem-like cells is required for viability  
661 and maintenance. *Proc Natl Acad Sci U S A* 104:16158-63.
- 662 55. Korkaya H, Paulson A, Charafe-Jauffret E, Ginestier C, Brown M, Dutcher J, *et al.* 2009.  
663 Regulation of mammary stem/progenitor cells by PTEN/Akt/beta-catenin signaling.  
664 *PLoS Biol* 7:e1000121.
- 665 56. Kolev VN, Wright QG, Vidal CM, Ring JE, Shapiro IM, Ricono J, *et al.* 2015.  
666 PI3K/mTOR dual inhibitor VS-5584 preferentially targets cancer stem cells. *Cancer Res*  
667 75:446-55.
- 668 57. Jiang BH, Liu LZ. 2008. Role of mTOR in anticancer drug resistance: perspectives for  
669 improved drug treatment. *Drug Resist Updat* 11:63-76.

- 670 58. Kim J, Woo AJ, Chu J, Snow JW, Fujiwara Y, Kim CG, *et al.* 2010. A Myc network  
671 accounts for similarities between embryonic stem and cancer cell transcription programs.  
672 *Cell* 143:313-24.
- 673 59. Berven LA, Willard FS, Crouch MF. 2004. Role of the p70(S6K) pathway in regulating  
674 the actin cytoskeleton and cell migration. *Exp Cell Res* 296:183-95.
- 675 60. Liu L, Li F, Cardelli JA, Martin KA, Blenis J, Huang S. 2006. Rapamycin inhibits cell  
676 motility by suppression of mTOR-mediated S6K1 and 4E-BP1 pathways. *Oncogene*  
677 25:7029-40.
- 678 61. Lamouille S, Derynck R. 2007. Cell size and invasion in TGF-beta-induced epithelial to  
679 mesenchymal transition is regulated by activation of the mTOR pathway. *J Cell Biol*  
680 178:437-51.
- 681 62. Gomez-Cambronero J. 2003. Rapamycin inhibits GM-CSF-induced neutrophil migration.  
682 *FEBS Lett* 550:94-100.
- 683 63. Gulhati P, Bowen KA, Liu J, Stevens PD, Rychahou PG, Chen M, *et al.* 2011. mTORC1  
684 and mTORC2 regulate EMT, motility, and metastasis of colorectal cancer via RhoA and  
685 Rac1 signaling pathways. *Cancer Res* 71:3246-56.
- 686 64. Zhang S, Qian G, Zhang QQ, Yao Y, Wang D, Chen ZG, *et al.* 2019. mTORC2  
687 Suppresses GSK3-Dependent Snail Degradation to Positively Regulate Cancer Cell  
688 Invasion and Metastasis. *Cancer Res* 79:3725-3736.
- 689 65. Hall A. 1998. Rho GTPases and the actin cytoskeleton. *Science* 279:509-14.
- 690 66. Liu L, Luo Y, Chen L, Shen T, Xu B, Chen W, *et al.* 2010. Rapamycin inhibits  
691 cytoskeleton reorganization and cell motility by suppressing RhoA expression and  
692 activity. *J Biol Chem* 285:38362-73.
- 693 67. Jacinto E, Loewith R, Schmidt A, Lin S, Ruegg MA, Hall A, *et al.* 2004. Mammalian  
694 TOR complex 2 controls the actin cytoskeleton and is rapamycin insensitive. *Nat Cell*  
695 *Biol* 6:1122-8.
- 696 68. Wang Q, Zhu N, Hu J, Wang Y, Xu J, Gu Q, *et al.* 2020. The mTOR inhibitor  
697 manassantin B reveals a crucial role of mTORC2 signaling in Epstein-Barr virus  
698 reactivation. *J Biol Chem* 295:7431-7441.
- 699 69. Li Y, Zhong C, Liu D, Yu W, Chen W, Wang Y, *et al.* 2018. Evidence for Kaposi  
700 Sarcoma Originating from Mesenchymal Stem Cell through KSHV-induced  
701 Mesenchymal-to-Endothelial Transition. *Cancer Res* 78:230-245.

## 702 **Figure Legends**

703 **Figure 1. Effect of LMP1 expression on mTOR signaling.** (A) E/M and xM subpopulations  
704 sorted from S26-LMP1/2A stable cell line, and E subpopulation sorted from S26 cells were  
705 analyzed by Western blotting for the expression and phosphorylation of mTOR components and  
706 substrates. (B) CNE-2 S26 and S18 cells were transfected with various doses of pcDNA3.1-  
707 LMP1. Forty-eight hours post-transfection, cell lysates were analyzed by Western blotting for the  
708 expression and phosphorylation of mTOR components and substrates. The expression or  
709 phosphorylation of proteins was quantitated by densitometry and plotted. (C) S26 and S18 cells  
710 that stably express LMP1 were examined by Western blotting for activation of mTOR signaling.  
711  $\beta$ -actin serves as the loading control.

712 **Figure 2. LMP1-mediated activation of mTORC1 confers on NPC cells cancer stemness**  
713 **properties.** (A) CNE-2 S18 cells were transduced with shRNA lentiviruses against mTOR,  
714 Raptor, and Rictor genes. The knockdown efficiencies and the functional consequences  
715 (phosphorylation of AKT at S473 and p70 S6K at T389) were analyzed by Western blots. (B  
716 and C) The effect of silencing mTOR signaling in S18 cells on Vimentin expression was  
717 analyzed by Western (B) and immunofluorescent assays (630X) (C). (D) CNE-2 S26 and S18  
718 cells were transfected with pcDNA3.1-LMP1 or combination of 0.3 $\mu$ g/ml pcDNA3.1-LMP1 and  
719 1 $\mu$ M BEZ235. Forty-eight hours post-transfection, cells were subjected to flow cytometry  
720 (Aldefluor) for ALDH<sup>br</sup> cells. ALDH<sup>br</sup> gating is established using the cells treated with ALDH  
721 inhibitor DEAB. (E) S18 and S26 cells were transduced with shRaptor, shRictor and shmTOR  
722 lentiviruses, selected with puromycin for 7 days, and then analyzed by Aldefluor assay. (F) S18  
723 cells were treated with mTORC1/2 dual inhibitor BEZ235 and mTORC1 inhibitor rapamycin for

724 24 hours. The effects of these treatments were determined by monitoring ALDH<sup>br</sup> populations  
725 using Aldefluor assay.

726 **Figure 3. Rapamycin-insensitive mTORC1 is essential for NPC drug resistance.** (A) Flow  
727 cytometry analysis of side population (SP) in CNE-2 S26 cells and S18 cells stained with  
728 Hoechst 33342. (B) S26 and S18 cells were transfected with pcDNA3.1-LMP1 or treated with  
729 combination 1 $\mu$ M BEZ235 and 0.2 $\mu$ g/ml pcDNA3.1-LMP1. 48 hours post-transfection, cells  
730 were subjected to flow cytometry analysis for SP cells. (C) S18 cells were transduced by specific  
731 shRNA lentiviruses to silence the expression of Raptor (shRaptor), Rictor (shRictor) and mTOR  
732 (shmTOR), respectively. The knockdown efficiency of each shRNA was verified by Western  
733 blot, as well as the functional consequences [phosphorylation of 4E-BP1(T37/46) and 4E-BP1].  
734 (D) Effects of shRNA-mediated knockdown of mTOR components were analyzed for SP by  
735 flow cytometry. (E) S18 cells and EBV-positive CNE2 cells (CNE2+) were treated mTORC1/2  
736 dual inhibitor BEZ235 and mTORC1 inhibitor rapamycin in various doses for 24 hours. The  
737 effects of these treatments on SP were analyzed by flow cytometry after staining with Hoechst  
738 33342. (F) The effects of the treatment on phosphorylation of 4E-BP1 at T37/46, p70S6K at  
739 T389 and AKT at S473 in S18 cells were examined. (G) Side population cells (SP) and non-side  
740 population cells (non-SP) were sorted from CNE2-S18 cells by FCS assay. The expression and  
741 phosphorylation of mTOR components and substrates in SP and non-SP cells were analyzed by  
742 Western blots. (H) The expression of ABCG2 mRNA relative to GAPDH in SP, non-SP, S18,  
743 and S26 cells was determined by RT-qPCR (Mean +/- SD of three biological replicates).

744 **Figure 4. Tumor initiation ability of nasopharyngeal cancer stem cells is mainly attributed**  
745 **to mTORC2.** (A) CNE2-S26 cells expressing LMP1 were treated with 1 $\mu$ M BEZ235 or 100nM  
746 Rapamycin and the effects of mTOR inhibitors on tumor initiation ability were analyzed by

747 tumorsphere-forming assay. Representative images are shown (50X) (mean  $\pm$ SD, n=3). **(B)**  
748 CNE2-S18 cells and EBV-positive TW03 cells (TW03+) were treated with 1 $\mu$ M BEZ235 or  
749 100nM Rapamycin and subjected to tumorsphere-forming assay. Representative images are  
750 shown (50X) (mean  $\pm$ SD, n=3 per group). **(C and D)** S18 cells and S26 cells were transduced  
751 with shRNA lentiviruses targeting Raptor (shRaptor), Rictor (shRictor) and mTOR (shmTOR),  
752 respectively. The effects of silencing mTOR components on tumor initiation ability were  
753 analyzed by tumorsphere-forming assay and representative images are shown (50X). The  
754 tumorsphere number of each sample was quantitated (mean  $\pm$ SD, n=3). **(E)** The knockdown  
755 efficiency of each shRNA and functional consequences (the phosphorylation of AKT and FoxO  
756 and the expression of pluripotent transcription factors Bmi-1, c-Myc, Sox2, KLF4, and Nanog)  
757 in CNE2-S18 cells were examined by Western analysis. **(F)** S18 cells and mTOR component  
758 knockdown cells were analyzed for apoptosis by Annexin-V flow cytometry assay. **(G)** S18 and  
759 these knockdown cells were subjected to CFSE dye dilution assays for cell proliferation ability.  
760 **(H)** Cell proliferation upon the shRNA knockdown of mTOR components were compared  
761 between S18 and S26 cells by CFSE dye dilution assays. **(F)** Dose-response curves of S18 and  
762 S26 cells to the treatment with Cisplatin, Rapamycin and BEZ235 were compared (mean  $\pm$ SD,  
763 n=3).

764 **Figure 5. Effects of silencing mTORC1 and mTORC2 on NPC cell migration and invasion**  
765 **capabilities.** **(A)** CNE2-S26 LMP1-expressing cells were treated with 1 $\mu$ M BEZ235 or 100nM  
766 Rapamycin and effects of the treatments on cell migration and invasion abilities were assayed  
767 using Transwell migration and invasion assays. Cells migrated to the lower chamber were fixed,  
768 stained with crystal violet, and counted (200X, mean  $\pm$ SD, n=3). **(B)** CNE2-S18 cells were  
769 treated with 1 $\mu$ M BEZ235 or 100nM Rapamycin and analyzed for invasion and migration. The

770 S18 cells that invaded into the lower chamber were fixed, stained and counted (200x, mean  $\pm$ SD,  
771 n=3). **(C and D)** S18 cells and cells expressing shRNAs targeting Raptor (shRaptor), Rictor  
772 (shRictor) and mTOR (shmTOR), respectively, were subjected to a wound healing assay for their  
773 migration ability. The knockdown efficiencies of shRNAs on each target genes were determined  
774 by Western blotting after 7 days of puromycin selection. **(E)** S18 cells and cells expressing  
775 shRaptor, shRictor and shmTOR were assayed for their migration and invasion abilities using  
776 Transwell migration and invasion assay (200X, mean  $\pm$ SD, n=3).

777 **Figure 6. Inhibition of mTOR signaling delayed tumor growth *in vivo*.** **(A)** CNE-2 S18 cells  
778 ( $5 \times 10^5$  cells, with Matrigel) and cells in that Raptor, Rictor and mTOR expression had been  
779 silenced by specific shRNAs were transplanted subcutaneously into the right flanks of BALB/C-  
780 nu/nu mice. After 30 days, tumors were stripped, and tumor mass were weighted. Data are  
781 represented as mean  $\pm$ SD and p-value of one-tailed unpaired t test. **(B)** Tumor sections were  
782 examined by H&E staining, IHC for Ki67 and TUNEL staining. **(C)** The effects of mTOR dual  
783 inhibitor BEZ235 on NPC tumor formation were examined in NPC xenograft model and mice  
784 were treated with BEZ235 in a dose of 45 mg/kg or 25 mg/kg body weight daily by intragastric  
785 administration. Images of NPC tumors treated with BEZ235 or vehicles are shown. **(D–F)** The  
786 effect of BEZ235 on tumor volume **(D)**, tumor weight **(E)** and body weight of mice **(F)** were  
787 illustrated.

788 **Figure 7.** Schematical illustration of a model for mTOR signaling regulating NPC cancer stem  
789 cell characteristics.

790

A

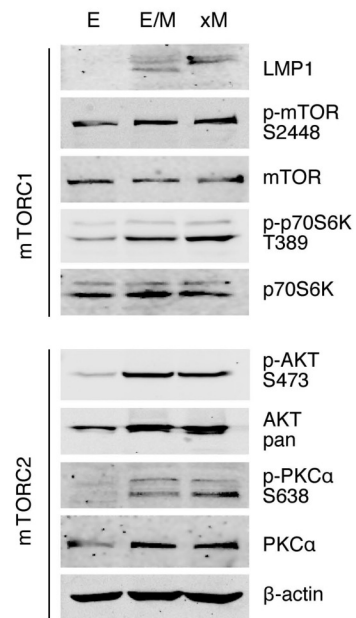

B

## Transient Transfection

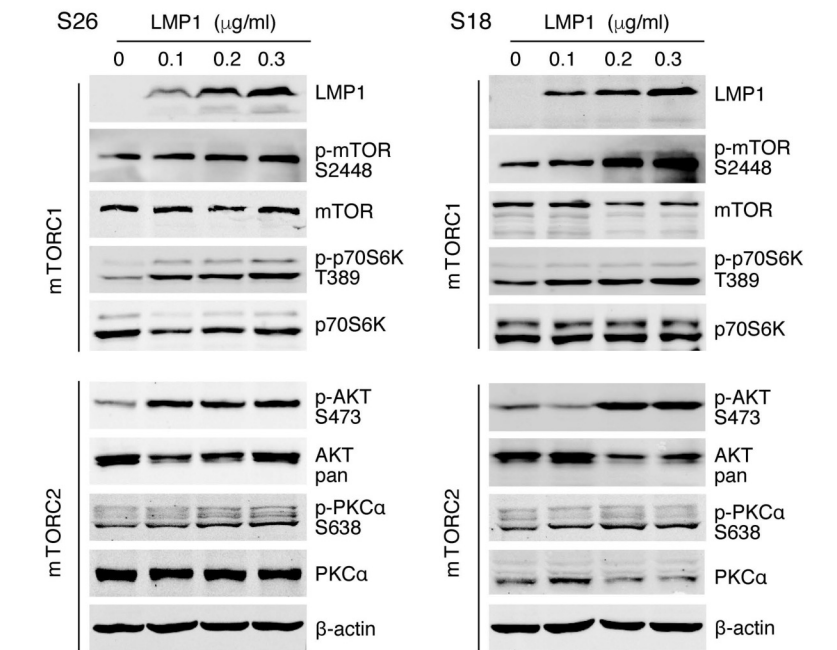

C

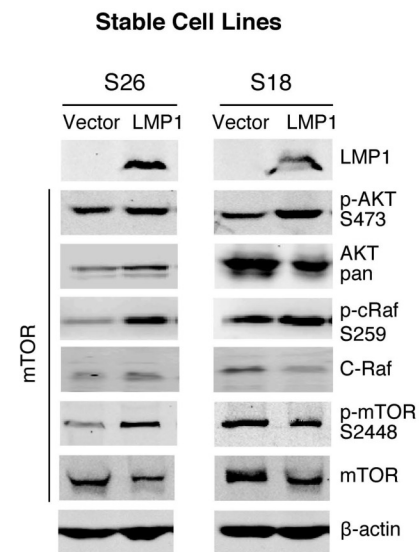



**A**

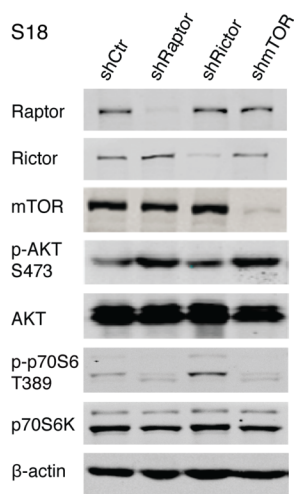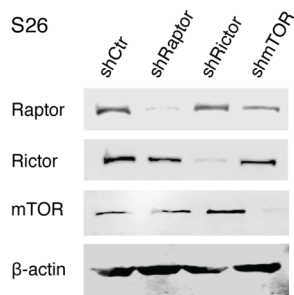

**B**

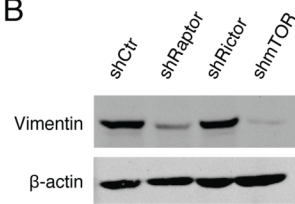

**C**

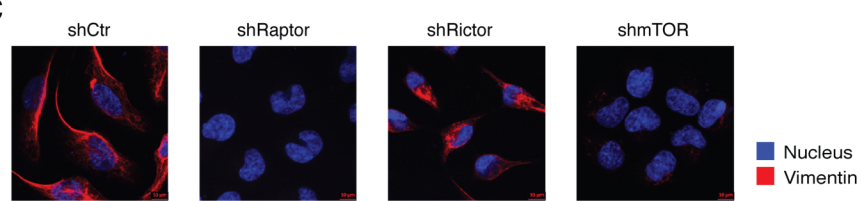

**D**

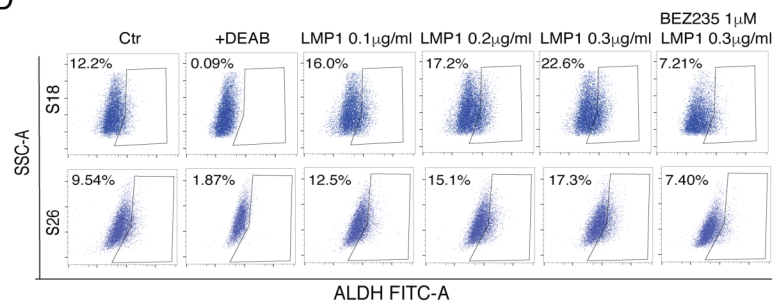

**E**

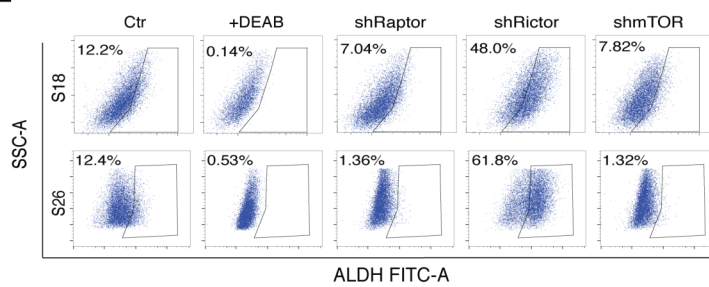

**F**

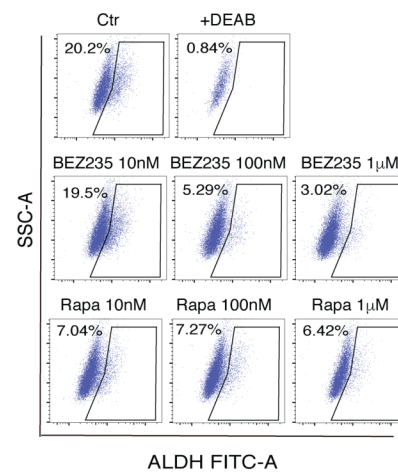



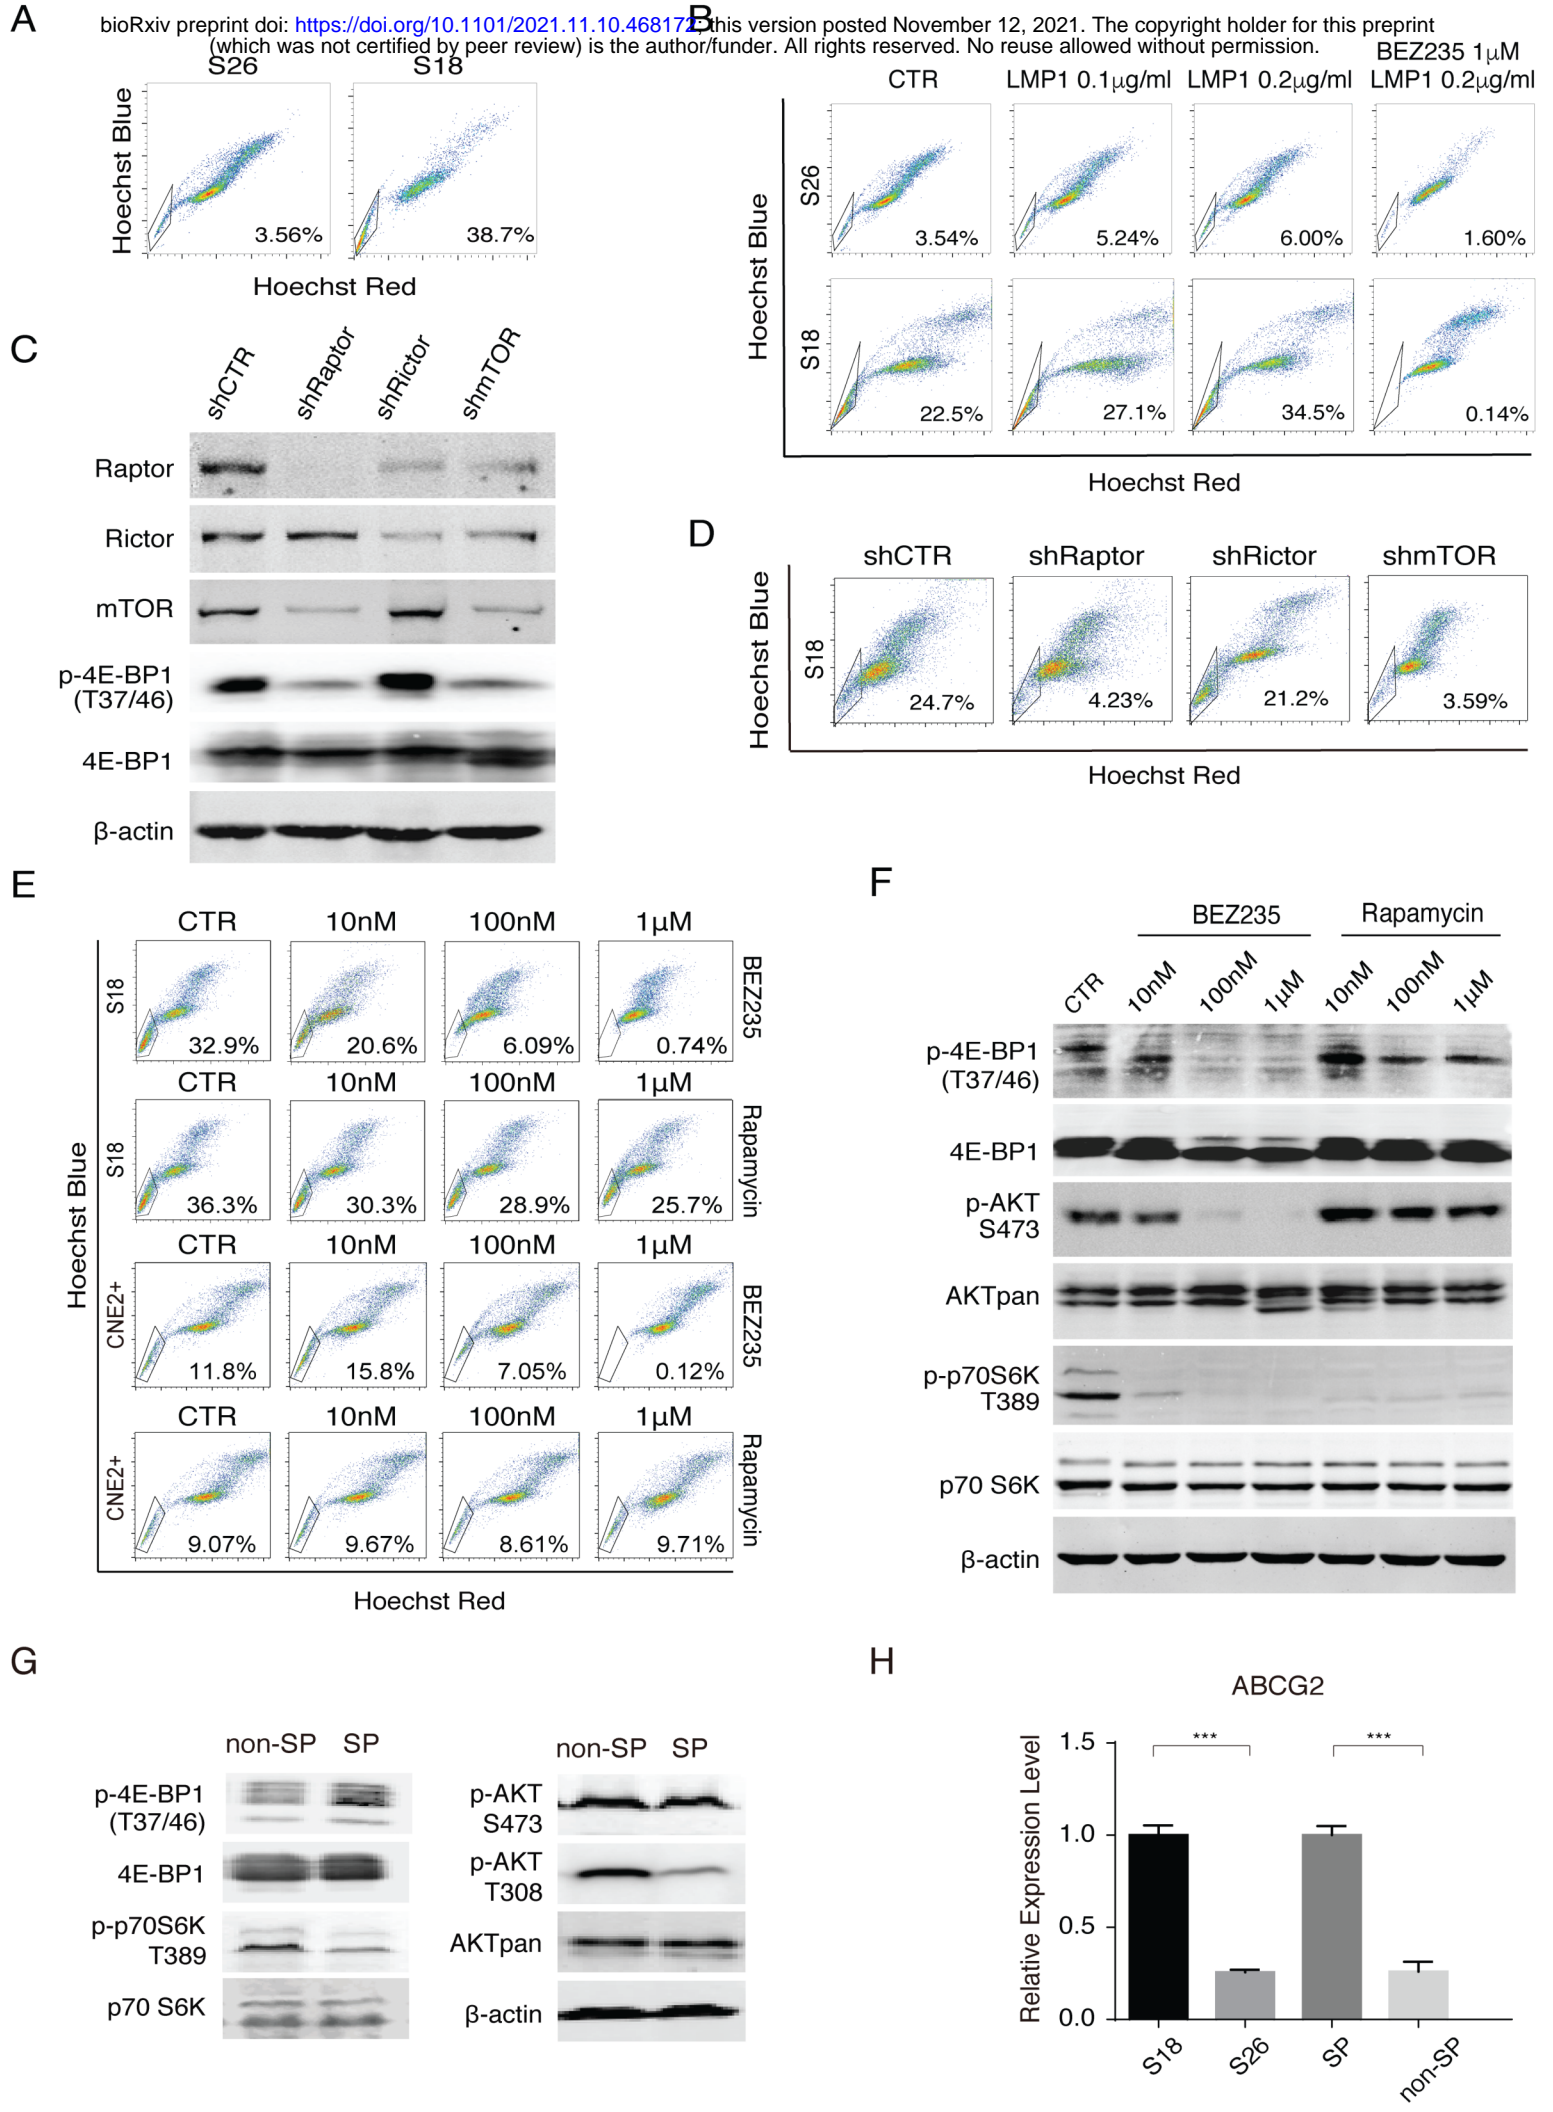

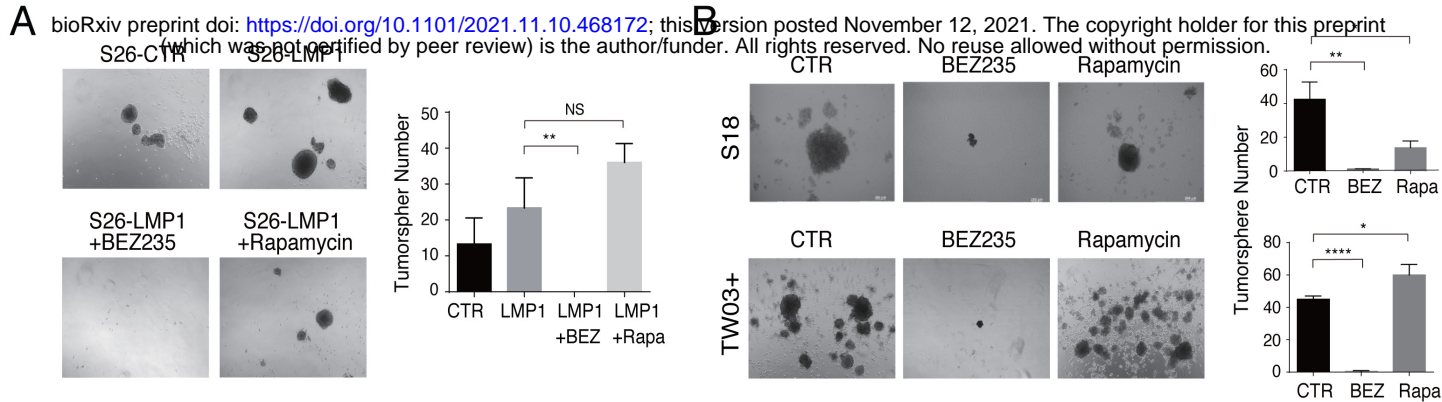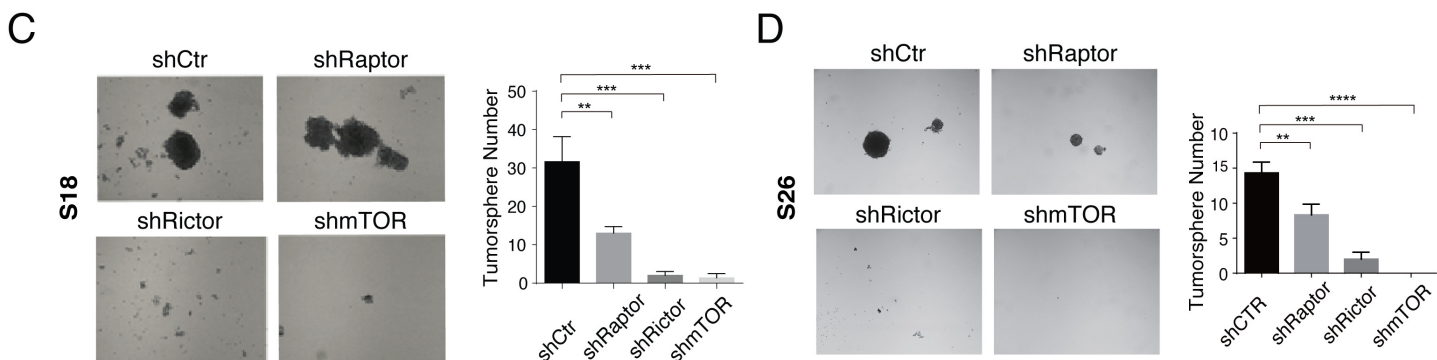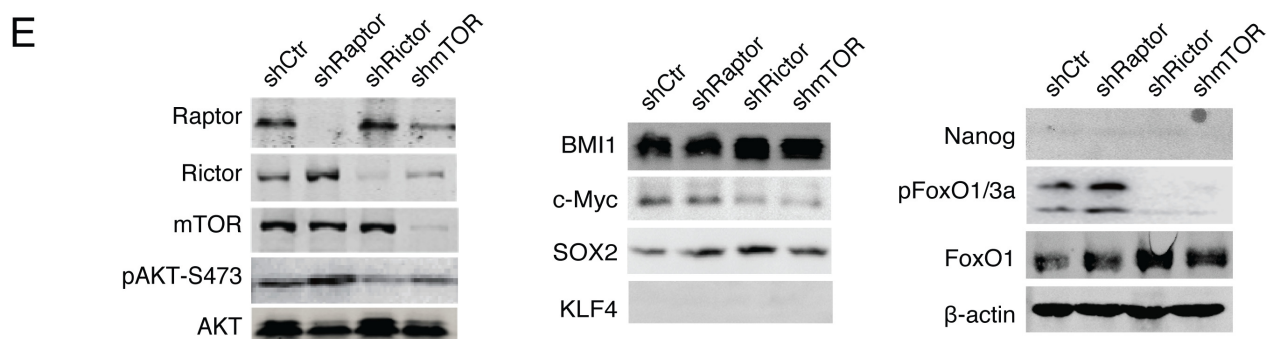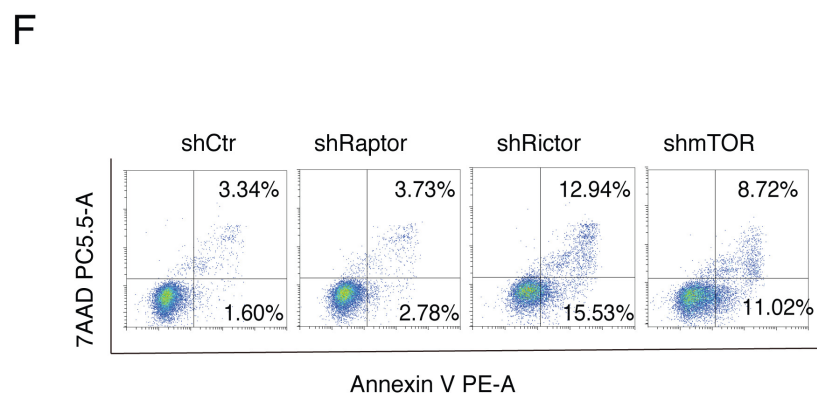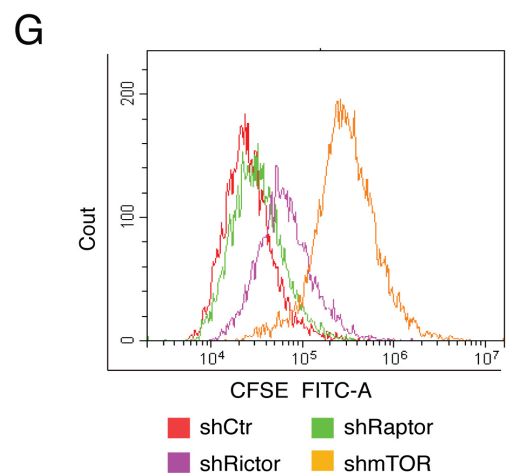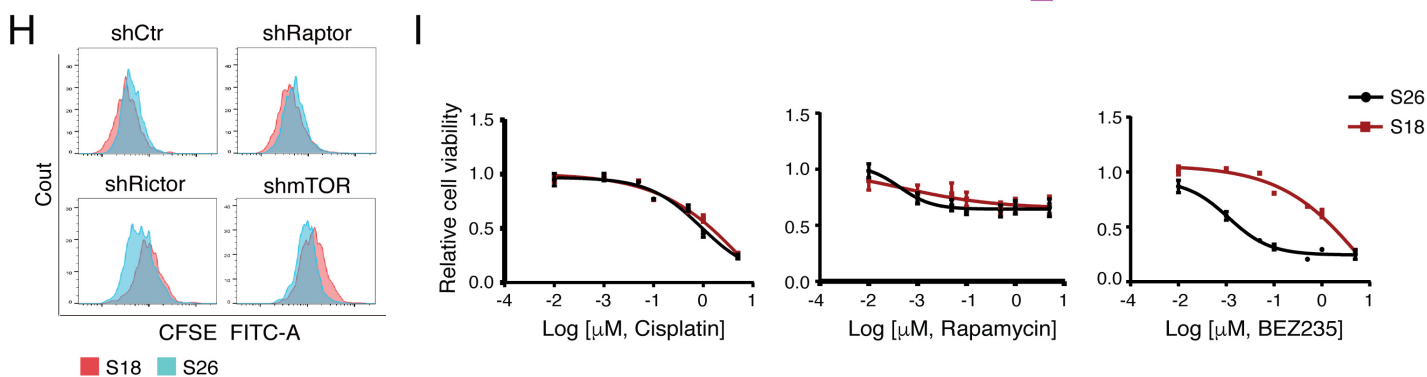



**A**

**S26 cells**

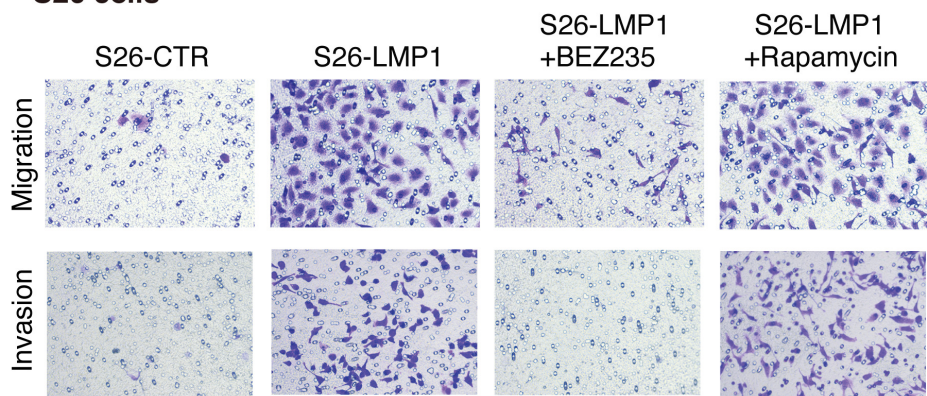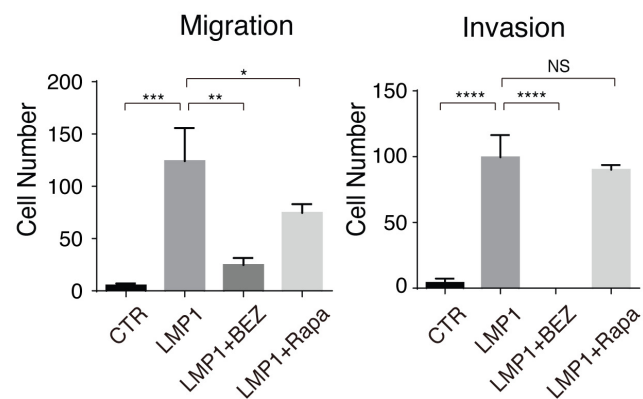

**B**

**S18 cells**

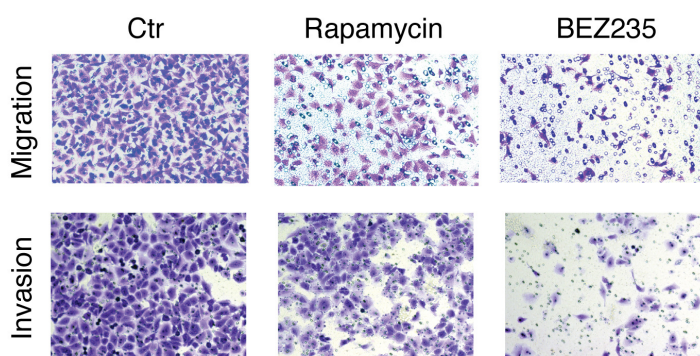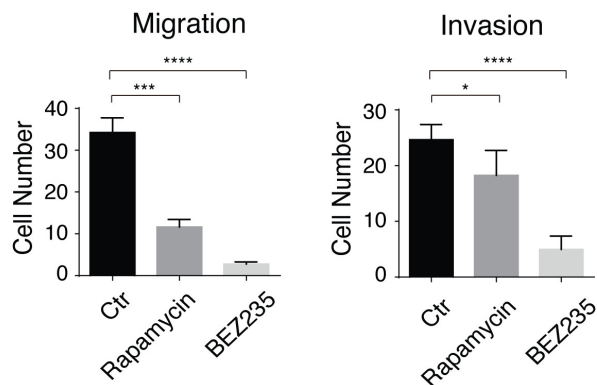

**C**

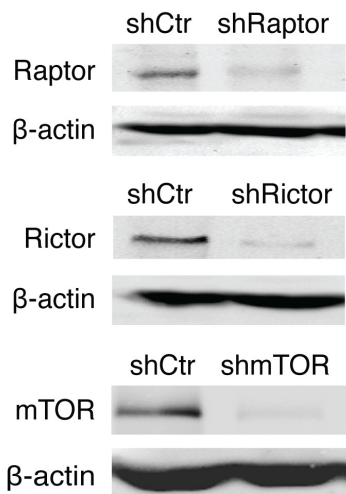

**D**

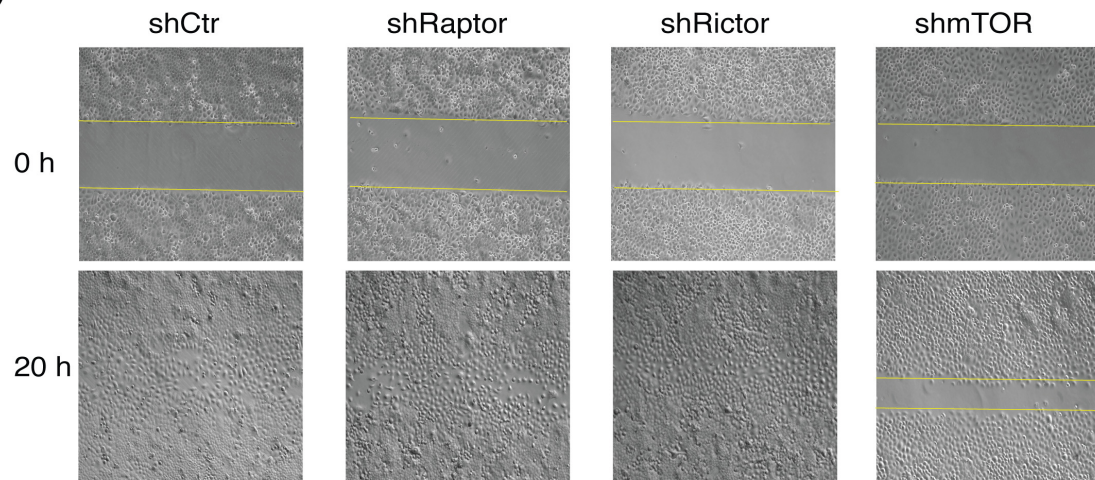

**E**

**S18 cells**

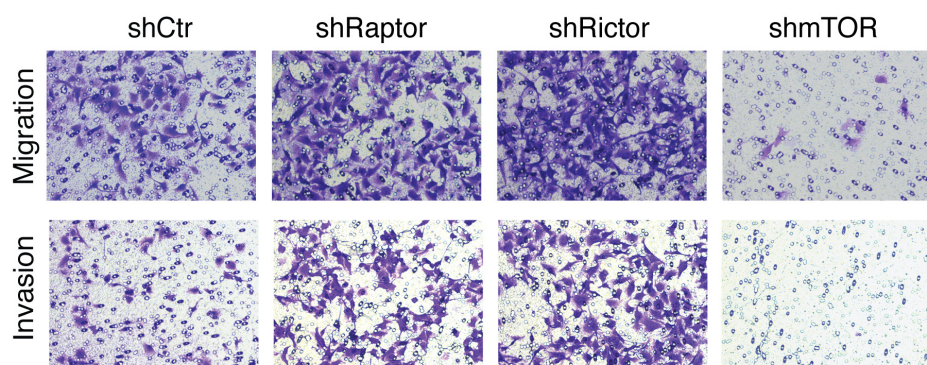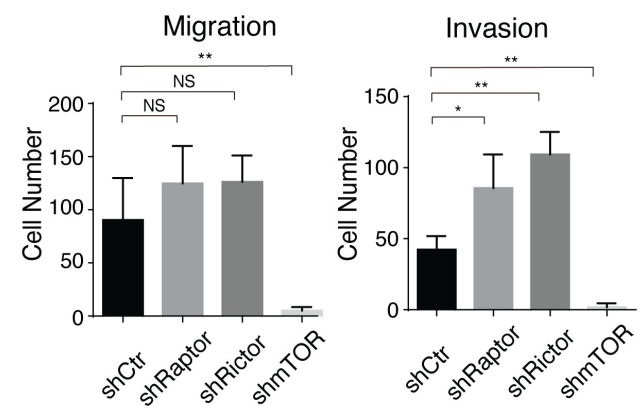



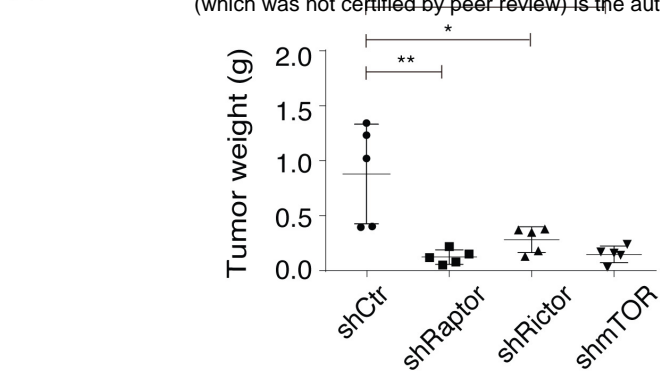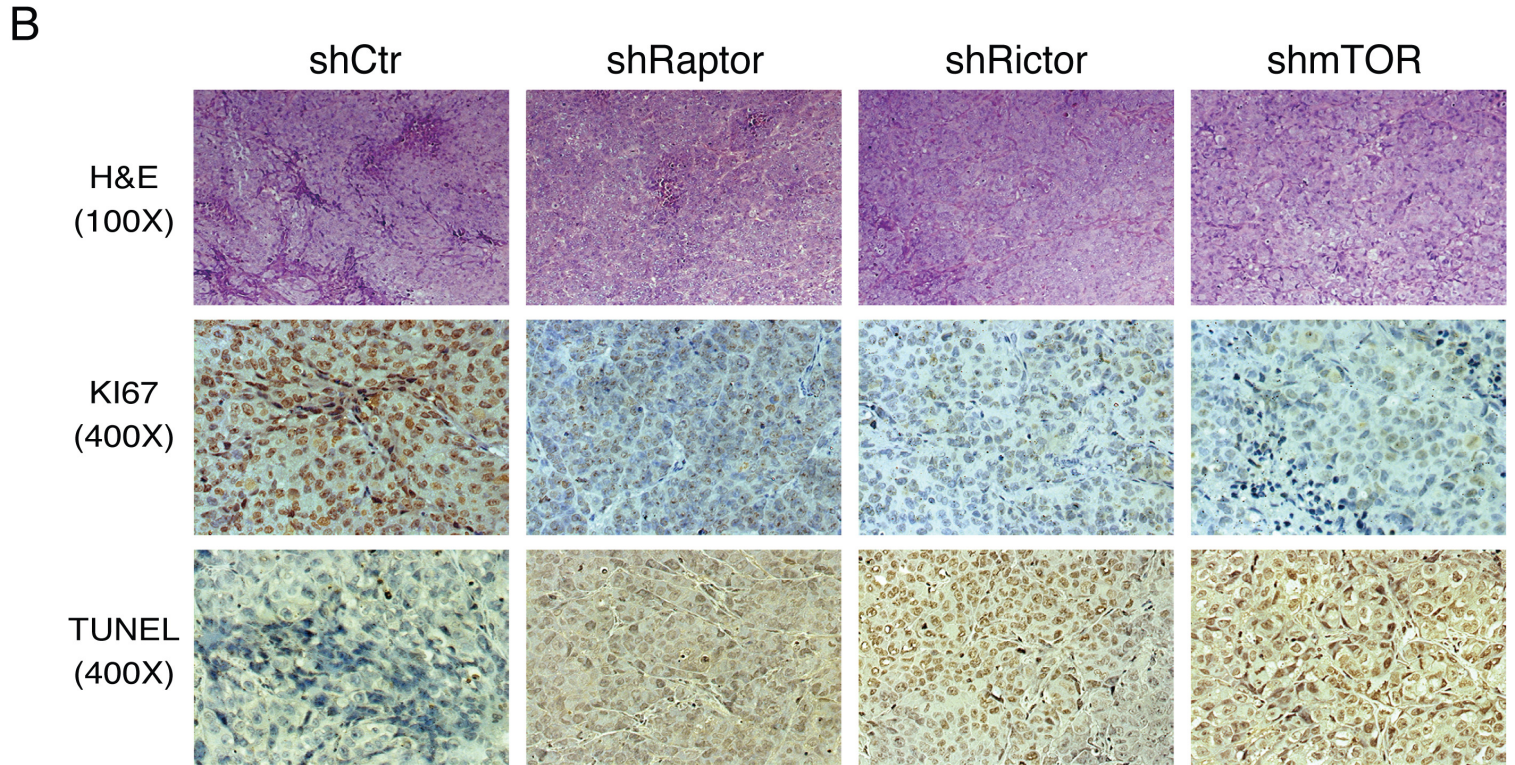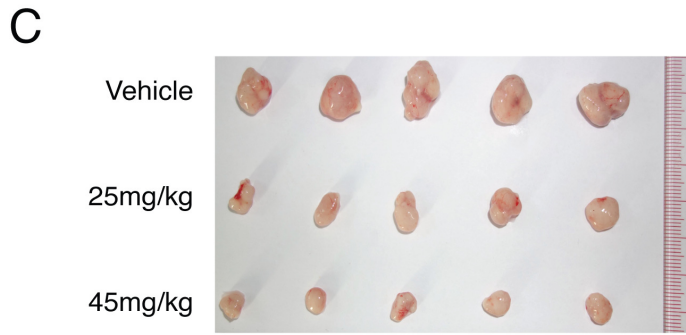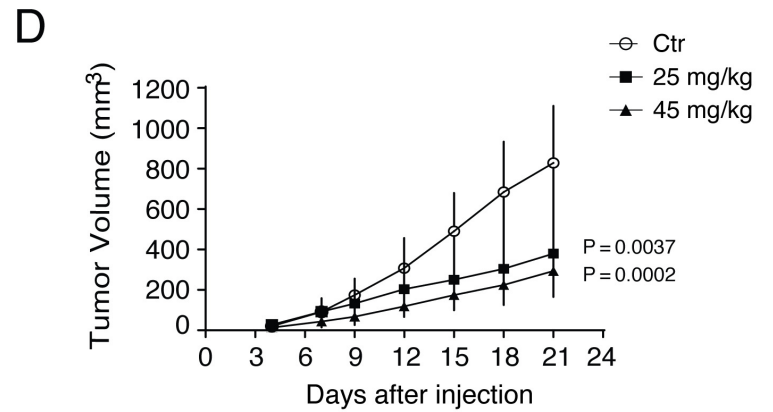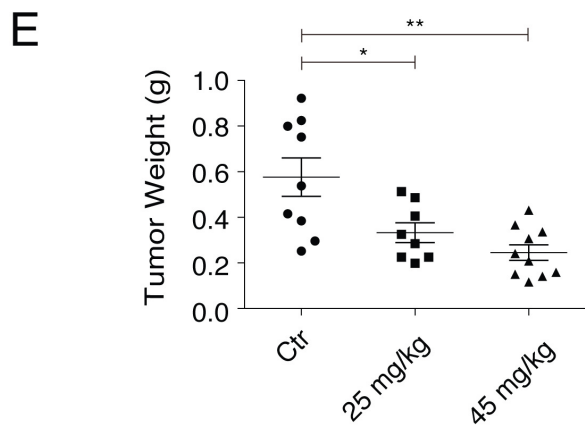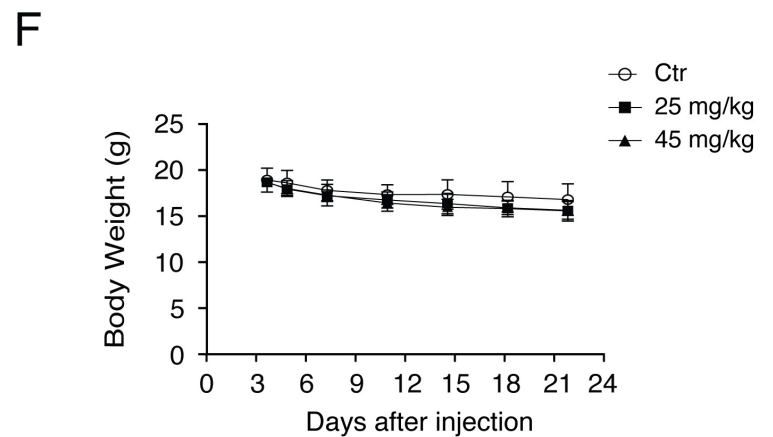

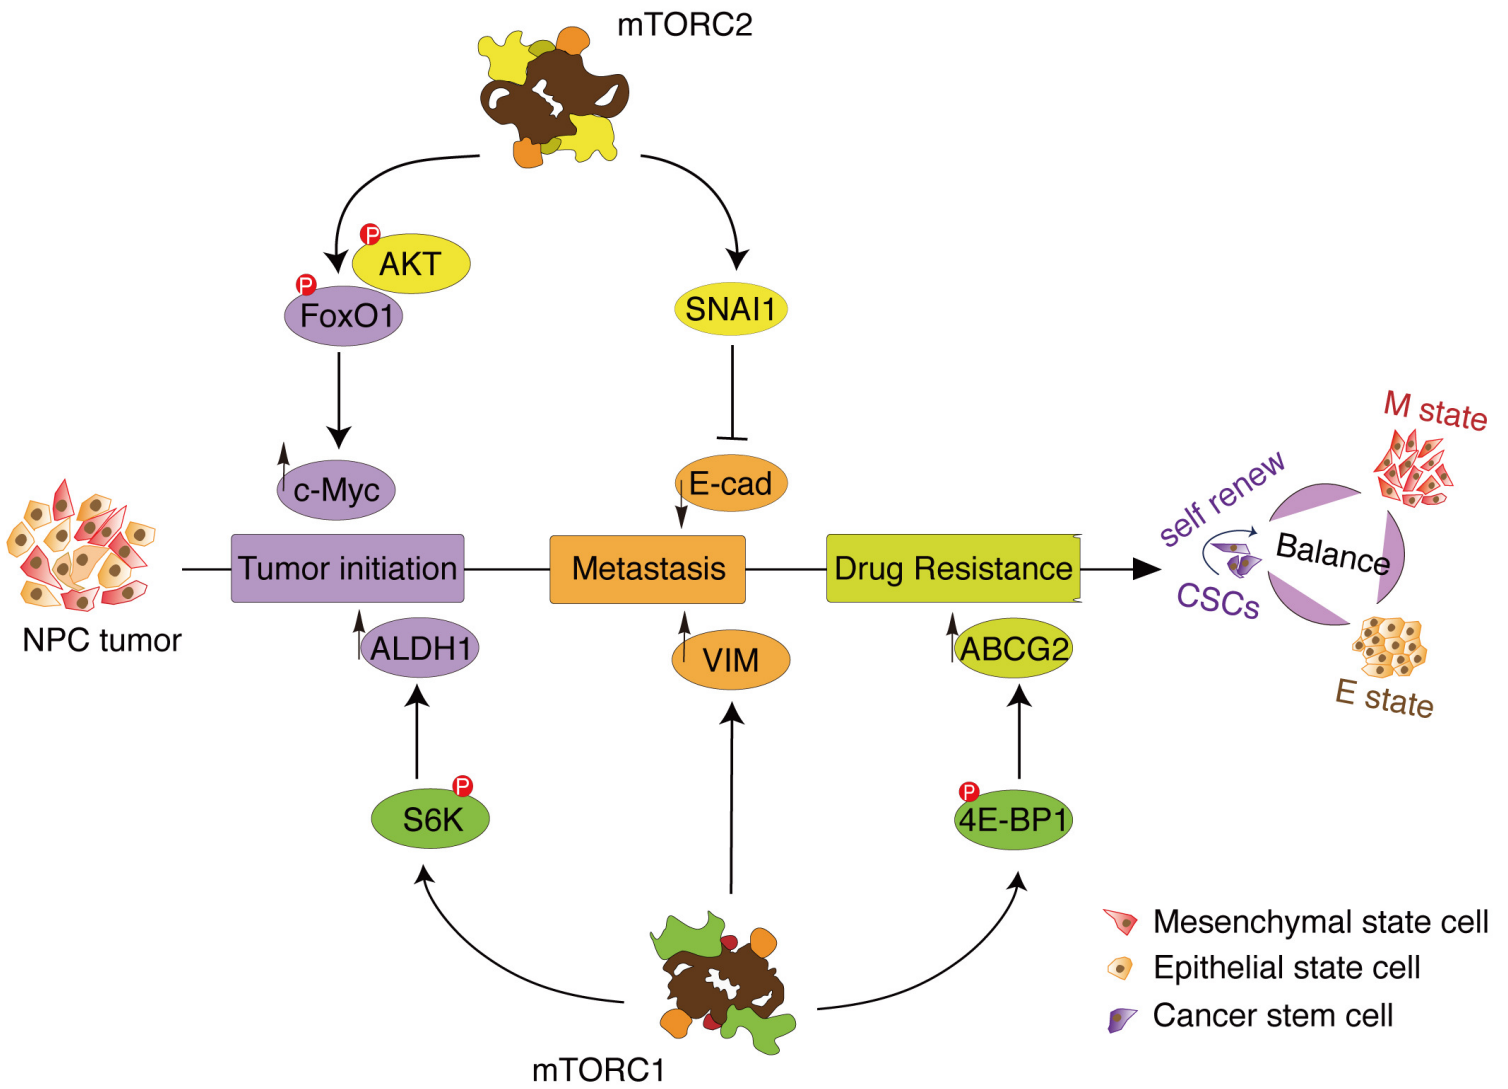

Source: https://www.biorxiv.org/content/biorxiv/early/2021/11/12/2021.11.10.468172.full.pdf
